# Supplementary material for: Unraveling the role of regulatory cell death in sepsis: an integrated analysis of bulk and single-cell sequencing data
Source: PeerJ journal article supplement (doi:10.7717/peerj.20167), 2025-10-14
Supplement: Supplemental_Material_Table_S1.xlsx [file Supplemental_Material_Table_S1.xlsx]

## Sheet: Sheet1
Netotic cell death	Oxeiptosis	Alkaliptosis	Anoikis	Mitotic cell death	Cuproptosis	Disulfidptosis	Lysosomal	Entotic cell death	Parthanatos	Autosis	Necroptosis	Pyrotosis	Mpt	Autophagy	Ferroptosis	Immunogenic cell death	Apoptosis
ATM	AIFM1	ACSS2	ABHD2	AAAS	ARFGEF1-DT	ABI2	AAAS	AMPK	ADPRHL2	ATP1A1	ABALON	AIM2	ABCD1	AAAS	A2M-AS1	A1BG	AATBC
C11orf65	AIFMI	ATP6V0D1	ABHD4	AAMP	ARID1A	ACSL4	AARS1	ATG5	ADPRS	ATP1A3	ACHE	BAKI	ABCD3	AARS1	ABCA4	AARS1	AATF
CAMP	AIRE	CA9	ABL1	AARS1	ATOX1	ACTB	ABCA1	ATG7	AIFM1	GAS5	ACTB	BAX	ADH1B	AATF	ABCB10	AAVS1	AATK
CRMA	CASP8	CALCOCO2	ACLY	AARS2	ATP7A	ACTN1	ABCA2	BECN1	AIMP2	H19	ACTC1	CASP1	ADH1C	ABCA1	ABCB6	ABCA1	ABALON
EIF2AK3-DT	CHCHD4	CHUK	ACP1	ABCA1	ATP7B	ACTN4	ABCA3	CDC42	ARH3	LINC02605	ACVR1B	CASP3	ADH5	ABCA7	ABCC1	ABCB1	ABCA1
EIPA	CRMA	CRMA	ACTB	ABCB1	C6orf136	AJAP1	ABCA4	CDHI	BDNF-AS	MIR216A	ADAM17	CASP4	AGTR1	ABCB1	ABCC5	ABCB5	ABCA3
ELANE	CUL3	GPX4	ACTG1	ABCB11	CALCOCO2	BAK1	ABCA5	CINNAI	CAST		ADAMTSL4	CASP5	AIFM1	ABCB7	ABCCI	ABCC1	ABCB1
LGALS3	FADD	HMGB1	ACTN4	ABCB4	CBX2	BCKDHA	ABCB1	CRMA	COL8A1		ADAR	CASP6	AKR1B1	ABCD3	ABCF3	ABCC11	ABCB10
MIA	FLNC	IKBKB	ADAM12	ABCB6	CD274	BCKDHB	ABCB11	CYBB	CRMA		ADRM1	CASP8	AKT1	ABCE1	ABRAXAS2	ABCC3	ABCB11
MMP1	IKBKE	IKBKG	ADAMTSL1	ABCB7	CDKN2A	BRK1	ABCB4	DIAPH1	CUL4A		AFG3L2	CASP9	ALB	ABCF1	ACACA	ABCG2	ABCB4
MPO	KEAP1	LINC01672	ADCY10	ABCC1	DLAT	CAPZB	ABCB6	EIF2AK3-DT	CYBB		AFP	CHMP2A	ALDH2	ABCF2	ACADSB	ABHD16A	ABCB5
NCXI	NRF2	MIR138-1	ADGRG1	ABCC2	DLD	CCS	ABCB7	EZR	DCAF10		AGFG1	CHMP2B	ALOX5	ABHD10	ACAP2-IT1	ABL1	ABCB7
PAD14	OTUD1	MIR181A2	ADH5	ABCC3	FDX1	CD2AP	ABCB9	GZMB	DDB1		AGO2	CHMP3	ANXA5	ABHD5	ACO1	ABRA	ABCC1
PADI2	PGAM4	MIR492	ADIPOQ	ABCC4	FOXD2-AS1	CHCHD4	ABCC1	LAMP1	DIABLO		AHR	CHMP4A	APAF1	ABI2	ACOT7	ACAN	ABCC2
PADI4	PGAM5	NFKB1	AFAP1L1	ABCC8	GCSH	CLIC3	ABCC8	LINC01672	EIF2AK3-DT		AHRR	CHMP4B	APP	ABL1	ACSF2	ACE	ABCC3
PGR-AS1	RAD23B	NFKBIA	AFP	ABCD1	GLS	CRELD1	ABCC9	LPAR2	ESR1		AHSG	CHMP4C	ATG5	ABL2	ACSL1	ACE2	ABCC4
PWAR1	RIPK1	RELA	AGK	ABCG2	GPX4	CRELD2	ABCD1	MAP1LC3A	ESR2		AIFM1	CHMP6	ATM	ABTB2	ACSL3	ACHE	ABCC6
SOD2-OT1	RNF31	RMRP	AKT1	ABCG5	H1-10-AS1	CYFIP1	ABCD4	MIR138-1	FEN1		AIFM2	CHMP7	ATP5IF1	ACACA	ACSL4	ACKR1	ABCC8
THORLNC	SHARPIN	SOD2-OT1	AKT2	ABCG8	H2BC6-AS1	DBN1	ABCG2	MIR181A2	GAS5		AIM2	CYCS	BAD	ACADM	ACSL5	ACKR2	ABCE1
TLX1NB	SOD2-OT1	SQSTM1	AKT3	ABHD12	HMGB1	DHTKD1	ABHD12	MIR492	GPX4		AKAP8L	ELANE	BAX	ACAT1	ACSL6	ACO2	ABCF1
	TBK1	TAX1BP1	ALDH1A1	ABL1	HSPD1	DNAJC10	ABHD5	MRTFA	HK1		AKNA	GPX4	BCL10	ACAT2	ACTB	ACOD1	ABCF2
	TMEM165		ANGPTL2	ABL2	LASTR	DSTN	ABHD6	MTOR	HSP70		ALOX15	GSDMA	BCL2	ACBD5	ACTBL2	ACP3	ABCG1
	TNF		ANGPTL4	ACACA	LIAS	EMILIN1	ABL1	MYH14	LINC01672		ALYREF	GSDMB	BCL2L1	ACE2	ACTC1	ACR	ABCG2
	TNFRSF1A		ANKRD13C	ACAD9	LINC00853	ENOX1	ABL2	PBKC3	MAPK8		AMBRA1	GSDMC	BDNF	ACER2	ACTR1B	ACRBP	ABCG4
			ANXA2	ACADM	LINC02154	ERO1A	ACAD9	RHOA	MCL1		ANGPT2	GSDMD	BID	ACIN1	ACTR2	ACTG1	ABI1
			ANXA5	ACADVL	LINC03085	ERO1B	ACADM	RMRP	MIF		ANO10	GSDME	BMPR1A	ACLY	ACVR1B	ACVR2A	ABL1
			APOBEC3G	ACD	LIPT1	ERP27	ACADS	RND3	MIR7-3HG		ANXA1	GZMB	BRCA2	ACO2	ADAM15	ADA	ABL2
			AR	ACE	METTL3	ERP29	ACADVL	RNF146	NAMPT		AP2B1	HMGB1	C11orf65	ACP1	ADAMTS9-AS1	ADAM10	ABLI
			ARHGAP19-SLIT1	ACE2	MTFI	ERP44	ACAN	ROCK	NAT10		AP2S1	IL18	C1QBP	ACSL3	ADAMTS9-AS2	ADAM17	ABRAXAS2
			ARHGDIA	ACHE	NLRP2	FLNA	ACE	RUBCN	NCF1		APC	IL1B	CAPN10	ACSS2	ADCY10	ADAMTS13	ABT1
			ARHGDIB	ACKR1	NLRP3	FLNB	ACE2	SOD2-OT1	OGG1		APOOL	IL6	CARMN	ACTA1	ADIPOR1	ADAMTS5	ACAA2
			ARHGEF28	ACOX1	NLRP7	FLNC	ACLY	TNFSF10	OTUD1		ARC	ILIA	CASP3	ACTB	ADORA2A	ADAMTSL1	ACACA
			ARHGEF7	ACP1	PDHAI	GFER	ACP2	TP53	PAAN		AREL1	IRF1	CASP8	ACTC1	ADSS2	ADAR	ACD
			ARVCF	ACP3	PDHB	GLRX	ACP3	UVRAG	PARP		ARHGEF2	IRF2	CASP9	ACTG1	AGPS	ADCYAP1	ACE
			ATF2	ACP5	PDHX	GLRX2	ACP4		PARP1		ARRDC1-AS1	NLRC4	CAST	ACTL6A	AHCY	ADGRG1	ACE2
			ATF4	ACSL4	PPP1R15A	GSR	ACP5		PGR-AS1		ASH1L-AS1	NLRP1	CAT	ACTL6B	AHCYL1	ADM	ACER1
			ATF5	ACTA1	SERPINE1	GSTO1	ACR		PTEN		ASIC1	NLRP2	CCDC47	ACTN1	AIFM1	ADORA1	ACER2
			ATOH8	ACTA2	SF3B1	GSTO2	ACSS2		RAB33A		ATAD3A	NLRP3	CCL26	ACTN4	AIFM2	ADRB1	ACER3
			ATP2A3	ACTB	SLC25A3	GYS1	ACTA1		RIPK1		ATF4	NLRP6	CCND1	ACTR2	AIM2	ADRB2	ACHE
			ATP6V1F	ACTC1	SLC27A5	IFI30	ACTB		RNF146		ATG5	NLRP7	CD200	ADAM12	AKAP1	AFF1	ACIN1
			ATP6V1H	ACTG1	SLC30A7	INF2	ACTC1		SIRT1		ATP2A1	NOD1	CD44	ADAM9	AKR1C1	AFP	ACKR1
			BAD	ACTG2	SLC31A1	IQGAP1	ACTN2		SOD2-OT1		ATP5F1C	NOD2	CDKN1A	ADAR	AKR1C2	AGER	ACKR2
			BAG1	ACTN1	SMAD3-AS1	ITGB3	ACY1		SQSTM1		ATXN2L	PJVK	CDKN1B	ADCY10	AKR1C3	AGFG1	ACKR3
			BAG4	ACTN2	SNHG16	LRPPRC	ACYP1		STING1		AURKA	PLA2G2A	CDKN2A	ADI1	AKRIC2	AGR2	ACLY
			BAK1	ACTN4	SQSTM1	MRPS36	ADA		TMX2-CTNND1		AURKC	PLCG1	CDKN3	ADIPOQ	AKRIC3	AGT	ACOX1
			BAP1	ACTR3	TAX1BP1	MSRA	ADAM10		TOMM20		AVEN	PRKACA	CERNA3	ADNP	AKRICI	AHR	ACP1
			BAX	ACVR1		MSRB1	ADAM17				AXL	PYCARD	CHEK2	ADRA1A	AKT1	AHRR	ACSL4
			BCAR1	ACVR1B		MSRB2	ADAMTSL1				BAG2	SCAFII	CHUK	ADRAIA	ALAS2	AHSG	ACSL5
			BCL10	ACVR2B		MSRB3	ADAMTSL2				BANF1	TINAP	COQ9	ADRB2	ALB	AICDA	ACTA1
			BCL2	ACVRL1		MYH10	ADCY5				BAP1	TIRAP	CRYAB	ADRM1	ALDH1A1	AIMP1	ACTA2
			BCL2L1	ACY1		MYH11	ADCY6				BAX	TNF	CS	ADSL	ALDH1A3	AIMP2	ACTB
			BCL2L11	ADAM10		MYH9	ADGRE2				BBC3	TP53	CSN1S1	AFG3L2	ALDH1L1	AIRE	ACTC1
			BCL2L15	ADAM15		MYL6	ADGRG6				BCL2	TP63	CSN3	AGER	ALDH1L2	AKAP13	ACTG1
			BCL2L2	ADAM17		MYL6B	ADGRV1				BCL2L1	WFDC12	CYCS	AGK	ALDH3A2	AKAP3	ACTL6A
			BDNF	ADAM9		NADPH	ADIPOQ				BCLAF1		CYP1A1	AGL	ALDH7A1	AKAP4	ACTN1
			BDNF-AS	ADAMTSL1		NCKAP1	ADPRH				BDNF		CYP1A2	AGO2	ALDOA	AKR1A1	ACTN2
			BICDL3P	ADAR		NDUFA11	ADRB2				BDNF-AS		CYP2C19	AGPS	ALG3	AKR1B10	ACTN4
			BID	ADCY10		NDUFS1	ADSL				BECN1		CYP2D6	AGR2	ALKBH5	AKR1C3	ACTR3
			BIN1	ADCY6		NUBPL	ADSS1				BID		CYP2E1	AGT	ALOX12	AKT1	ACVR1
			BIRC2	ADGRB3		NXN	AFG3L2				BIRC2		DIABLO	AHCY	ALOX12B	ALB	ACVR1B
			BIRC3	ADGRG1		OGDH	AGA				BIRC3		DLEU2	AHNAK	ALOX15	ALCAM	ACVR1C
			BIRC5	ADGRG6		OGDHL	AGA-DT				BMI1		DNAH8	AHR	ALOX15B	ALDH4A1	ACVR2A
			BLNK	ADIPOQ		OXSM	AGFG1				BNIP3		DNM1L	AIFM1	ALOX5	ALG1	ACVR2B
			BLTP2	ADNP		P4HB	AGL				BNIP3L		DRD2	AIM2	ALYREF	ALG3	ACVRIB
			BMF	ADORA2A		PDHA1	AGRN				BRAF		DYNLT1	AIMP1	AMBRA1	ALG8	ACVRL1
			BMI1	ADSL		PDHA2	AGT				BRAP		EGFR	AIMP2	AMER1	ALK	ADA
			BMP2	AFDN		PDHB	AHCY				BRD4		ERBB2	AKAP13	ANKHD1	ALOX12	ADAM10
			BMP4	AFF1		PDIA2	AHNAK				BUB1B		ERCC2	AKR1B10	ANKRD1	ALPP	ADAM12
			BMP6	AFG3L2		PDIA3	AHR				C1orf220		F10	AKR1C3	ANO1	AMBP	ADAM15
			BMP7	AFP		PDIA4	AIFM1				C20orf204		F2	AKT1	ANO6	AMFR	ADAM17
			BMPR2	AGER		PDIA5	AIRE				C5		F3	AKT1S1	ANP32A	ANAPC4	ADAM28
			BNIP3	AGK		PDIA6	AKAP4				C6		F5	AKT2	ANP32B	ANG	ADAM9
			BNIP3L	AGL		PDILT	AKR1B10				C7		FADD	AKT3	ANXA1	ANK2	ADAMTS9-AS2
			BRAF	AGO2		PDLIM1	AKT1				C8orf44		FAS	AKTI	ANXA2	ANKRD13A	ADAMTSL1
			BRCA1	AGPAT2		PGK1	AKTIP				C9		FASLG	ALCAM	ANXA3	ANKRD17	ADAMTSL4
			BRCA2	AGRN		PIGK	ALB				CACNA1G-AS1		FH	ALDH18A1	ANXA4	ANKRD30A	ADAR
			BRD4	AGT		PRDX1	ALDH3A2				CAD		FIS1	ALDH1A1	ANXA5	ANKRD36B	ADCY1
			BRMS1	AGTPBP1		QSOX1	ALDH5A1				CADM1		GPHN	ALDH2	APCDD1L-DT	ANO10	ADCY10
			BSG	AGTR1		QSOX2	ALDH7A1				CALCOCO2		GPR17	ALDH7A1	APEX1	ANPEP	ADCYAP1
			BST1	AGTR2		RAC1	ALDOA				CALM1		GPX1	ALDH9A1	APOC1	ANTXR2	ADCYAP1R1
			BST2	AHCY		RPN1	ALDOB				CALM2		GSK3B	ALDOA	APOL3	ANXA1	ADD1
			BTRC	AHI1		RRM1	ALG14				CALM3		GSR	ALG1	APP	ANXA2	ADD3
			BUB1	AICDA		RRM2	ALG2				CALML5		GSTM1	ALK	AR	ANXA3	ADIPOQ
			BUB3	AIF1		RRM2B	ALG3				CALU		GSTM3	ALKBH5	ARCN1	ANXA4	ADIPOR1
			C5AR1	AIFM1		SCO2	ALK				CAMK2		GSTT1	ALS2	ARG2	ANXA5	ADIPOR2
			CALR	AIM2		SELENOT	ALMS1				CAPN2		HEBP2	AMBRA1	ARGLU1-DT	ANXA6	ADK
			CAMTA1	AIMP1		SLC3A2	ALPL				CAPN7		HGF	AMFR	ARHGAP6	APC	ADM
			CAPNS1	AIMP2		SLC7A11	ALPP				CAPNI		HK2	AMOT	ARHGEF26-AS1	APCS	ADORA1
			CARD10	AIP		STAB1	ALS2				CAPZA1		HMMR	ANG	ARMC5	APOA1	ADORA2A
			CARMN	AIRE		STAB2	AMH				CARD6		HMOX1	ANKHD1	ARPC1A	APOB	ADORA2B
			CASC9	AJUBA		TLN1	AMHR2				CASP1		HTR2A	ANKZF1	ARRDC1-AS1	APOBEC3A	ADORA3
			CASP10	AK2		TM9SF2	AMPD1				CASP10		HTT	ANP32A	ASAH2	APOBEC3B	ADORAI
			CASP14	AKAP10		TMX1	AMT				CASP2		IFNA1	ANP32E	ASCL4	APOBEC3F	ADRA1D
			CASP2	AKAP13		TMX2	ANK2				CASP3		IFNG	ANXA1	ASMTL-AS1	APOBEC3G	ADRB1
			CASP3	AKAP8		TMX3	ANKFY1				CASP4		IKBKB	ANXA11	ASXL1	APOH	ADRB2
			CASP6	AKAP9		TMX4	ANKRD27				CASP6		IL10	ANXA2	ASXL2	APP	ADRB3
			CASP7	AKT1		TXN	ANO3				CASP7		IL13	ANXA5	ATF2	AREG	ADRM1
			CASP8	AKT2		TXN2	ANO5				CASP8		IL1A	ANXA6	ATF3	ARG1	AEN
			CASP9	AKT3		TXNDC12	ANPEP				CASP9		IL1B	ANXA7	ATF4	ARG2	AFAP1-AS1
			CAST	ALAD		TXNDC17	ANTXR2				CASPI		IL2	AP1M1	ATF6	ARHGAP11A	AFF1
			CAT	ALB		TXNDC2	ANXA2				CBL		IL2RB	AP1S3	ATG16L1	ARHGAP24	AFG1L
			CAV1	ALDH18A1		TXNDC5	ANXA5				CBR3-AS1		IL6	AP2A1	ATG5	ARHGAP45	AFG3L2
			CBL	ALDH1A1		TXNDC8	ANXA6				CCL2		JAK2	AP2A2	ATG7	ARID1A	AFP
			CBS	ALDH3A2		TXNL1	AP1AR				CCNT1		L1CAM-AS1	AP2B1	ATIC	ARPC4	AGAP2
			CCAR2	ALDOA		TXNRD1	AP1B1				CCT3		LDLR	AP2M1	ATL1	ARRB1	AGAP2-AS1
			CCDC178	ALG1		TXNRD2	AP1G1				CCT5		LEP	AP3D1	ATM	ARSA	AGER
			CCDC80	ALK		TXNRD3	AP1G2				CCT6A		LINC02605	AP4B1	ATP2A1-AS1	ARSB	AGFG1
			CCL5	ALMS1		VKORC1	AP1M1				CCT8		LOC129929542	AP4E1	ATP5F1A	ARSH	AGGF1
			CCN1	ALOX5		VKORC1L1	AP1M2				CD274		LOC129993881	AP4M1	ATP5F1B	ASF1A	AGK
			CCN2	ALPG		WASF2	AP1S1				CD40LG		LYRM4	APAF1	ATP5MC3	ASPG	AGO1
			CCN6	ALPI			AP1S2				CD74		MAP3K14	APC	ATP6V1E1	ASS1	AGO2
			CCND1	ALPL			AP1S3				CDC37		MAPK1	APEH	ATXN8OS	ASTE1	AGO4
			CCR7	ALPP			AP2A2				CDC42		MAPK14	APEX1	AURKA	ATAD3A	AGPAT2
			CCT5	ALS2			AP2M1				CDC42BPG		MAPK3	APOA1	AVP	ATF5	AGR2
			CD151	AMACR			AP3B1				CDC7		MAPK8	APOB	BACH1	ATM	AGT
			CD24	AMBRA1			AP3B2				CDK1		MAX	APOE	BACHI	ATP2A2	AGTR1
			CD274	AMH			AP3D1				CDK9		MDM4	APOL1	BAMBI	ATR	AGTR2
			CD36	AMN1			AP3DI				CDKN2A		MFN2	APP	BANF1	ATRIP	AHCY
			CD44	ANAPC1			AP3M1				CEP170		MIR146A	AQP3	BAP1	ATRIP-TREX1	AHCYL1
			CD63	ANAPC11			AP3M2				CEP44		MIR187	AQR	BBOX1-AS1	ATRX	AHR
			CD99	ANAPC2			AP3S1				CERK		MLH1	AR	BCAP31	AURKA	AHSA1
			CDC25C	ANAPC4			AP3S2				CERNA3		MMP9	ARAF	BCAR3	AURKC	AHSG
			CDC42	ANAPC5			AP4B1				CFLAR		MOCS1	ARF1	BCAR4	AUTS2	AHSP
			CDCP1	ANAPC7			AP4E1				CGAS		MOCS2	ARF3	BCAT2	AZGP1	AICDA
			CDH1	ANGPT1			AP4M1				CHCHD4		MOCS3	ARF4	BDNF-AS	AZU1	AIF1
			CDH2	ANGPT2			AP4S1				CHL1		MRE11	ARFIP2	BECN1	B2M	AIFM1
			CDH3	ANK1			AP5B1				CHMP1		MT3	ARG1	BEX1	B4GALT1	AIFM1P1
			CDH5	ANK2			AP5M1				CHMP1A		MTARC2	ARG2	BGN	BAD	AIFM2
			CDK1	ANK3			AP5S1				CHMP2A		MTR	ARHGAP26	BIRC5	BAGE	AIFM3
			CDK11A	ANKLE2			APBB1				CHMP2B		MT-TK	ARHGAP27P1	BMAL1	BAK1	AIFMI
			CDK11B	ANKRD26			APIG1				CHMP4A		NAT2	ARHGAP4	BNC1	BANCR	AIM2
			CDK2	ANKZF1			APIM1				CHMP4B		NBN	ARHGDIA	BNIP3	BAP1	AIMP1
			CDKN1A	ANLN			APIM2				CHMP4C		NCLN	ARHGEF2	BNIP3L	BARD1	AIMP2
			CDKN1B	ANO1			APIS1				CHMP5		NDUFS4	ARHGEF28	BOLA3-DT	BAX	AIRE
			CDKN2A	ANO10			APIS2				CHMP6		NFKB1	ARL1	BRAF	BCAP31	AJUBA
			CDKN3	ANPEP			APIS3				CHMP7		NFKBIA	ARL13B	BRD4	BCAR3	AK2
			CDX2	ANXA1			APLP2				CHRNA4		NFS1	ARL8A	BSG	BCAR4	AK5
			CEACAM1	ANXA11			APOA1				CHROMR		NOMO1	ARL8B	BTN3A1	BCAS3	AKAP12
			CEACAM3	ANXA2			APOB				CHTOP		NOMO2	ARMC3	C19orf12	BCAT1	AKAP13
			CEACAM4	ANXA5			APOD				CHUK		NOMO3	ARPC2	C1QBP	BCHE	AKAP8L
			CEACAM5	AP3B1			APOE				CLEC7A		NOS1	ARPC4	C1QL3	BCL2	AKIP1
			CEACAM6	AP3D1			APOF				CLINT1		NOS2	ARPP19	C1QTNF6	BCL2L1	AKR1A1
			CEACAM8	AP4M1			APOH				CLTC		NOS3	ARRB1	C1RL-AS1	BCL6	AKR1B1
			CEBPB	APAF1			APOL1				CNBP		NOX5	ASAH1	C8orf76	BCR	AKR1B10
			CEMIP	APBB1			APP				COPA		NTHL1	ASCC3	CA9	BDNF-AS	AKR1C1
			CENPF	APC			AQP1				COPB2		OGDH	ASF1A	CACNA1G-AS1	BECN1	AKR1C2
			CERNA3	APEX1			AQP2				COPS2		OPRM1	ASIC1	CAD	BGLAP	AKR1C3
			CFLAR	APOA1			AR				COX10-DT		P2RX7	ASNS	CALCOCO2	BID	AKT1
			CHEK2	APOB			ARF1				CPSF2		PALB2	ASPH	CAPG	BIK	AKT1S1
			CHI3L1	APOC3			ARF6				CPSF3		PARP1	ASS1	CARMN	BIRC2	AKT2
			CHKB-CPT1B	APOE			ARFGEF2				CPSF6		PARP4	ATAD3A	CARS	BIRC3	AKT3
			CHUK	APP			ARFGEF3				CPT2		PCNA	ATAD3B	CARS1	BIRC5	AKTI
			CLDN1	APPL1			ARFI				CREB1		PEX11A	ATF3	CASC2	BIRC7	AKTIP
			CLDN18	APRT			ARG1				CRMA		PEX11B	ATF4	CASC8	BLTP2	ALB
			CLDN6	APTX			ARHGEF10				CRTAM		PEX13	ATF6	CASC9	BLZF1	ALCAM
			CLIC4	AQP1			ARL8A				CTAG2		PEX16	ATG10	CASK	BMI1	ALDH1A1
			CLPTM1	AQP4			ARL8B				CTSB		PEX19	ATG101	CASP2	BMP2	ALDH1L1
			CLPTM1L	AQP5			ARPC1B				CTSD		PEX2	ATG12	CASP6	BMP3	ALDH2
			CLU	AR			ARRB1				CTSH		PEX26	ATG12P1	CASP8	BMP4	ALDH9A1
			CMA1	ARAF			ARRB2				CTSL		PGR	ATG12P2	CAV1	BMP6	ALDOA
			COL13A1	AREG			ARRDC3				CTSS		PGR-AS1	ATG13	CBR3-AS1	BMP7	ALG2
			COL17A1	ARF6			ARSA				CUL3		PITPNM1	ATG14	CBS	BMS1P20	ALK
			COL4A2	ARG1			ARSB				CUL4A		PLA2G2A	ATG16L1	CBSLR	BOP1	ALKBH7
			COPS5	ARHGEF1			ARSD				CXCL1		PLA2G4A	ATG16L2	CBX3	BPI	ALKBH8
			CPEB2	ARHGEF18			ARSG				CXCL5		PLA2G6	ATG2A	CBX5	BPIFA1	ALMS1
			CPT1A	ARHGEF2			ARSH				CYLD		PNPLA8	ATG2B	CCDC124	BRAF	ALOX12
			CRABP2	ARID1A			ARSK				CYTOR		POMC	ATG3	CCDC144NL-AS1	BRAP	ALOX15
			CRIPTO	ARID1B			ARX				DAPK1		PPID	ATG3P1	CCL5	BRCA1	ALOX15B
			CRMA	ARNT			ASAH1				DCD		PPIF	ATG4A	CCT3	BRCA2	ALOX5
			CRYAB	ARPC1B			ASAH2				DDIT3		PRDX5	ATG4AP1	CCT4	BRD4	ALOX5AP
			CRYBA1	ARRB1			ASAH2B				DDX17		PRKCA	ATG4B	CCT5	BRD9	ALPG
			CSF1	ARRB2			ASAHI				DDX3X		PRL	ATG4C	CCT6A	BRIP1	ALPI
			CSF1R	ARSA			ASB15				DDX5		PTAFR	ATG4D	CCT8	BSG	ALPK2
			CSF2	ASCL1			ASCC1				DERL1		PTEN	ATG5	CD274	BTK	ALPL
			CSF3	ASNS			ASCL1				DGUOK-AS1		PTGS1	ATG7	CD276	BTN3A2	ALPP
			CSK	ASPH			ASGR1				DIABLO		RAB4B-EGLN2	ATG9A	CD300LD-AS1	C11orf65	ALX4
			CSNK2A1	ASPM			ASGR2				DINOL		RAB5IF	ATG9B	CD36	C12orf57	ALYREF
			CSPG4	ASPSCR1			ASPA				DIRAS3		RAD50	ATIC	CD44	C1QA	AMBP
			CTBP1	ASS1			ATAD1				DLEU2		RB1	ATL3	CD59	C1QBP	AMBRA1
			CTNNA1	ASXL1			ATF4				DLX6-AS1		RECQL	ATM	CD82	C3	AMD1
			CTNNB1	ATF1			ATG10				DNAJA1		RHD	ATN1	CDC25A	C3AR1	AMFR
			CTNNBIP1	ATF2			ATG12				DNAJA2		RUNX1	ATP12A	CDC42	C4A	AMH
			CTNND1	ATF3			ATG13				DNM1L		SDHB	ATP13A1	CDCA7	C4BPA	AMIGO2
			CTTN	ATF4			ATG14				DNMIL		SEC61A1	ATP13A2	CDH2	C5AR1	AMPD1
			CXADR	ATF6			ATG16L1				DNMT1		SEC61B	ATP1A1	CDH4	CA9	ANAPC1
			CXCL1	ATG5			ATG5				DPEP1		SEC61G	ATP1B1	CDK1	CABYR	ANAPC2
			CXCL12	ATG7			ATG7				DRD2		SELE	ATP1B3	CDK14	CACNA1A	ANG
			CXCL14	ATIC			ATG9A				DSTYK		SERPIND1	ATP2A2	CDKN1A	CACNA1G-AS1	ANGPT1
			CXCL8	ATL1			ATL1				DYNLL1		SLC25A17	ATP4A	CDKN2A	CACYBP	ANGPT2
			CXCR1	ATM			ATL3				EEF1A1		SLC25A24	ATP5F1A	CDO1	CAGE1	ANGPTL4
			CXCR4	ATN1			ATM				EEF2		SLC25A26	ATP5F1B	CEACAM5	CALB1	ANGPTL6
			CYCS	ATP11C			ATN1				EGFR		SLC25A3	ATP5F1C	CEBPA	CALCA	ANKHD1
			CYP3A4	ATP13A2			ATP10B				EGR1		SLC25A4	ATP5IF1	CELF2	CALCOCO1	ANKRD1
			DAP3	ATP1A1			ATP11A				EIF2A		SLC25A6	ATP5PO	CENPF	CALCRL	ANO1
			DAPK1	ATP1A2			ATP11C				EIF2AK2		SLC5A7	ATP6AP1	CEP290	CALM1	ANO9
			DAPK2	ATP2A2			ATP12A				EIF2AK3		SLC6A2	ATP6AP2	CERNA3	CALM2	ANP32A
			DFFA	ATP2B2			ATP13A2				EIF2AK3-DT		SLC6A3	ATP6V0A1	CERS6	CALM3	ANP32B
			DGAT2	ATP2B4			ATP1A1				EIF4B		SMAD5-AS1	ATP6V0A2	CERS6-AS1	CALML4	ANPEP
			DIABLO	ATP5F1A			ATP1A2				EIF4EBP1		SNCA	ATP6V0B	CFL1	CALML5	ANTXR1
			DLG1	ATP5F1E			ATP1A3				ELAVL1		SOD1	ATP6V0C	CFTR	CALR	ANXA1
			DLK1	ATP6AP1			ATP1B1				ELP1		SOD2-OT1	ATP6V0D1	CHAC1	CALR3	ANXA10
			DNMT1	ATP6AP2			ATP1B3				EMD		SRD5A1	ATP6V0D2	CHACl	CAMK2G	ANXA2
			DOC2B	ATP6V0A2			ATP2A1				EMSLR		SRD5A2	ATP6V0E1	CHEK2	CAMP	ANXA2R
			DOCK1	ATP7A			ATP2A2				EPAS1		SRD5A3	ATP6V0E2	CHKB-CPT1B	CAND1.11	ANXA3
			DOK2	ATP8B1			ATP4A				EPB41L4A-AS1		SUOX	ATP6V1A	CHMP1A	CANX	ANXA4
			DUSP19	ATR			ATP6AP1				ERH		TH	ATP6V1B1	CHMP5	CARMN	ANXA5
			DUSP4	ATRIP			ATP6AP1L				ESR2		TLR2	ATP6V1B2	CHMP6	CASC15	ANXA6
			DUXAP9	ATRX			ATP6AP2				ESYT2		TMCO1	ATP6V1C1	CHPF	CASP1	ANXA7
			DYNLL2	ATXN1			ATP6V0A1				EZH2		TMEM127	ATP6V1C2	CIAO1	CASP3	AOAH
			E2F1	ATXN2			ATP6V0A2				FADD		TMEM147	ATP6V1D	CIAO2A	CASP5	AP2A1
			EDA2R	ATXN3			ATP6V0A4				FAF1		TMX2-CTNND1	ATP6V1E1	CIRBP	CASP6	AP2A2
			EDAR	ATXN7			ATP6V0B				FAF2		TNF	ATP6V1E2	CISD1	CASP7	AP3B1
			EDIL3	AURKA			ATP6V0C				FAM13A-AS1		TNFSF10	ATP6V1F	CISD2	CASP8	AP5M1
			EDNRA	AURKB			ATP6V0CP1				FAM225A		TP53	ATP6V1G1	CISD3	CASP9	APAF1
			EDNRB	AURKC			ATP6V0D1				FAM83D		TRAF2	ATP6V1G2	CKB	CAT	APAFI
			EEF1A1	AVEN			ATP6V0D2				FAP		TRPA1	ATP6V1H	CLTB	CAV1	APBB1
			EEF1A2	AVP			ATP6V0E1				FAS		TRPM2	ATP6VIA	CNBP	CAV2	APC
			EEF2K	AXIN1			ATP6V0E2				FASLG		TRPS1	ATP6VIB1	CNTNAP4	CBFB	APCDD1
			EFHD2	AXIN2			ATP6V1A				FASN		TRV-AAC1-4	ATP6VIB2	COMMD10	CBLB	APCS
			EGF	AXL			ATP6V1B1				FCGBP		TSPO	ATP6VIC2	COPA	CBLIF	APEX1
			EGFL7	B2M			ATP6V1B2				FERMT1		TXN	ATP6VICI	COPB1	CBR1	API5
			EGFR	B4GALT1			ATP6V1C1				FIP1L1		TXNRD1	ATP6VID	COPB2	CCAT1	API5P1
			EHMT2	BABAM2			ATP6V1C2				FKBP1A		UCP1	ATP6VIE2	COPE	CCDC34	API5P2
			EI24	BACE1			ATP6V1D				FLII		VDAC1	ATP6VIG1	COPG1	CCDC62	APIP
			EIF2AK3	BACH2			ATP6V1E1				FLJ13224		VIM	ATP6VIH	COPG2	CCDC68	APLN
			EIF3D	BAD			ATP6V1E1P1				FLNC		WDR83OS	ATP7A	COPZ1	CCKBR	APLNR
			EIF4EBP1	BAG1			ATP6V1E1P2				FLOT1		WWOX	ATP7B	COQ2	CCL11	APLP1
			EIF4G2	BAG3			ATP6V1E1P3				FLOT2		XDH	ATPAF1	COX4I1	CCL15-CCL14	APOA1
			ELANE	BAG4			ATP6V1E2				FLT3		XRCC1	ATR	COX5B	CCL16	APOB
			ELAVL1	BAG6			ATP6V1F				FMR1		XRCC3	ATXN1	COX7A1	CCL17	APOC1
			ELK1	BAK1			ATP6V1G1				FNDC4			ATXN2	CP	CCL18	APOC2
			EMSLR	BANF1			ATP6V1G1P1				FNDC5			ATXN2L	CPEB4	CCL19	APOC3
			ENDOG	BAP1			ATP6V1G1P2				FPR1			ATXN3	CPLX2	CCL2	APOE
			EP300	BARD1			ATP6V1G2				FTH1			ATXN7	CPS1	CCL20	APOH
			EPHA2	BAX			ATP6V1G3				FTL			AUP1	CREB1	CCL21	APOL3
			EPHB6	BBC3			ATP6V1H				FUNDC1			AUPI	CRIM1	CCL22	APOL6
			EPO	BBS4			ATP6VIH				FUS			AURKA	CRMA	CCL25	APP
			ERBB2	BCAP31			ATP7A				G3BP2			AURKB	CRY1	CCL28	APPBP2
			ERBB4	BCAR1			ATP7B				G6PD			AVEN	CRYAB	CCL3	APPL1
			ESR2	BCAS3			ATRAID				GABPB1-AS1			AXIN1	CS	CCL4	APPLI
			ETS1	BCL10			ATXN2				GAS5			AZGP1	CSRP2	CCL5	APRT
			ETV4	BCL11A			ATXN3				GBA3			AZI2	CST1	CCL7	AQP1
			ETV7	BCL11B			ATXN7				GBE1			BACE1	CST4	CCNA1	AQP2
			EZH2	BCL2			AUH				GCC2			BAD	CSTA	CCNB2	AQP3
			EZR	BCL2A1			AZU1				GJA1			BAG1	CTH	CCND1	AQP4
			F10	BCL2L1			B2M				GJB1			BAG2	CTNNB1	CCND2	AQP8
			F2RL1	BCL2L11			B3GALNT2				GLNA			BAG3	CTNND1	CCNT1	AR
			F3	BCL2L12			B3GAT3				GLTP			BAG5	CTSB	CCR1	ARAF
			F9	BCL2L2			B4GAT1				GLUD1			BAG6	CTSE	CCR10	ARAP1
			FADD	BCL6			BACE1				GLUD2			BAK1	CTSZ	CCR2	ARAP1-AS1
			FAS	BCL7B			BAG3				GMDS-DT			BANCR	CUL4A	CCR3	ARC
			FASLG	BCL9			BAMBI				GNAO1-AS1			BANF1	CUL4B	CCR4	AREG
			FASN	BCOR			BANF1				GNLY			BANP	CUL9	CCR5	AREL1
			FBLIM1	BCORL1			BAX				GOLGA3			BAP1	CX3CL1	CCR6	ARF1
			FBLN7	BCR			BCAN				GOSR1			BAX	CXCR4	CCR7	ARF3
			FBXW7-AS1	BCS1L			BCAP31				GPX4			BBC3	CYB5R1	CCT8	ARF4
			FER	BDNF			BCL10				GRK4			BCAP31	CYBB	CD109	ARF6
			FGF1	BDNF-AS			BCL2				GSDMD			BCAR1	CYGB	CD14	ARG1
			FGF2	BECN1			BCL2L1				GSDME			BCAS3	CYLD	CD160	ARG2
			FGFR1	BEST1			BCL2L11				GSK3A			BCCIP	CYP24A1	CD177	ARHGAP1
			FLNA	BGLAP			BCL6				GSK3B			BCL10	CYTOR	CD19	ARHGAP10
			FN1	BICD2			BCR				GSN			BCL2	DANCR	CD1A	ARHGAP17
			FOSL1	BID			BCYRN1				GTF3C3			BCL2A1	DARS1-AS1	CD1B	ARHGAP24
			FOXA1	BIK			BDNF				H1-10			BCL2L1	DAZAP1	CD1C	ARHGDIA
			FOXC2	BIN1			BDNF-AS				H1-10-AS1			BCL2L10	DCAF8	CD1D	ARHGDIB
			FOXO3	BIRC2			BECN1				H1-2			BCL2L11	DCD	CD1E	ARHGEF2
			FOXP1	BIRC3			BECN2				H1-5			BCL2L2	DDB1	CD2	ARHGEF28
			FRZB	BIRC5			BEST1				H19			BCLAF1	DDIT4	CD200	ARHGEF3
			FYN	BIRC7			BGLAP				H2A			BCR	DDR2	CD207	ARHGEF6
			GALNT4	BLM			BGN				H2AC12			BCYRN1	DDX11-AS1	CD209	ARHGEF7
			GAS5	BLOC1S3			BICD2				H2AC25			BDNF-AS	DECR1	CD22	ARID1A
			GATA6	BLZF1			BID				H2BC12			BECN1	DECR2	CD226	ARID4B
			GDF2	BMI1			BIN1				HCCAT5			BECN1P2	DHCR7	CD247	ARL11
			GKN1	BMP2			BIRC2				HCG18			BECN2	DHODH	CD27	ARL6IP1
			GLI1	BMP4			BIRC5				HCG27			BHLHE40	DHRS4-AS1	CD274	ARL6IP5
			GLI2	BMP6			BLK				HEIH			BHLHE41	DHX9	CD276	ARMC10
			GLO1	BMP7			BLOC1S1				HELQ			BICD2	DIAPH3	CD28	ARMCX1
			GLUD1	BMPR1A			BLOC1S2				HEMGN			BID	DKK1	CD33	ARNT
			GNE	BMPR1B			BLOC1S3				HGF			BIK	DLD	CD34	ARRB1
			GPER1	BMPR2			BLOC1S4				HIF1A			BIRC2	DLEU1	CD36	ARRB2
			GRB2	BNIP3			BLOC1S5				HMGB1			BIRC3	DLEU2	CD38	ASAH1
			GRHL2	BRAF			BLOC1S5-TXNDC5				HMOX1			BIRC5	DLST	CD3E	ASAH2
			GRN	BRAT1			BLOC1S6				HNF1A-AS1			BIRC6	DLX2	CD4	ASCL1
			GRSF1	BRCA1			BLOC1S6P1				HNRNPA1			BIRC7	DLX6-AS1	CD40	ASF1B
			GSK3B	BRCA2			BLOCIS1				HNRNPA2B1			BLMH	DNAJA1	CD40LG	ASIC1
			GSN	BRD2			BLOCIS2				HNRNPF			BLOC1S1	DNAJA2	CD44	ASNS
			GSTP1	BRD4			BLZF1				HNRNPH1			BLZF1	DNAJB6	CD46	ASS1
			GZMB	BRD7			BMP15				HNRNPH3			BMAL1	DNAJC12	CD47	ATAD3A
			H19	BRIP1			BMP2				HNRNPL			BMF	DNAJC3-DT	CD52	ATAD5
			HAVCR2	BSG			BMP4				HNRNPM			BMI1	DNAJC7	CD55	ATF1
			HCCAT5	BTD			BMP6				HNRNPU			BMP1	DNAJC9	CD58	ATF2
			HDAC6	BTG2			BMP7				HOOK1			BMP2	DNM3OS	CD59	ATF3
			HGF	BTK			BMPR1B				HPRT1			BMP2K	DNMT1	CD63	ATF4
			HIF1A	BTRC			BNIP3				HPSE			BMP3	DOCK8-AS1	CD68	ATF5
			HIP1R	BUB1			BNIP3L				HRNR			BMP4	DPEP1	CD69	ATF6
			HK2	BUB1B			BOLL				HSP90A			BMP5	DPP4	CD70	ATG10
			HMCN1	BUB3			BORCS5				HSP90AA1			BMP6	DPP9	CD74	ATG12
			HMGA1	C11orf65			BORCS6				HSP90AB1			BMPR2	DPYSL2	CD79A	ATG13
			HMOX1	C1QBP			BORCS7				HSPA1A			BMS1	DUOX1	CD79B	ATG14
			HOTAIR	C3			BORCS8				HSPA1B			BNIP1	DUSP26	CD80	ATG16L1
			HOXA10	C9orf72			BRAF				HSPA4			BNIP3	DUT	CD81	ATG2B
			HOXA9	CA2			BRAT1				HSPA5			BNIP3L	DUXAP8	CD83	ATG3
			HOXB13	CA9			BRCA1				HSPA8			BOK	ECH1	CD86	ATG4B
			HRAS	CABLES1			BRCA2				HSPA9			BORCS5	EEF1A1	CD8A	ATG4D
			HRC	CACNA1A			BSCL2				HSPBAP1			BORCS6	EEF2	CD9	ATG5
			HSP90B1	CACNA1S			BSG				HSPD1			BRAF	EFEMP1	CD99	ATG7
			HSPA1A	CACNB4			BST2				HTRA2			BRCA1	EFTUD2	CDB2	ATM
			HSPB1	CAD			BTD				HULC			BRD4	EGFR	CDC42EP1	ATMIN
			HTRA1	CADM1			BTK				IAH1			BRI3BP	EGLN1	CDCA7	ATN1
			HTRA2	CALB2			BTRC				ID1			BRIX1	EHHADH	CDH1	ATP1A1
			HTRA3	CALCA			BVES				IDH1			BRSK2	EIF2AK3	CDH3	ATP1A3
			HULC	CALM1			C12orf4				IDH2			BSCL2	EIF2AK3-DT	CDK1	ATP1B1
			ICAM1	CALM2			C19orf12				IDO1			BSG	EIF3H	CDK12	ATP2A1
			ID2	CALM3			C1orf131				IFNA			BSN	EIF3J-DT	CDK4	ATP2A2
			ID4	CALR			C1QBP				IFNAR1			BST2	EIF4A1	CDK6	ATP2A3
			IDH1	CAMK2A			C3				IFNAR2			BTF3	EIF4H	CDK9	ATP2B1
			IFI27	CAMK2G			C4A				IFNB			BTRC	EIF5	CDKN1A	ATP2B4
			IFI6	CANX			C5				IFNB1			BUB3	ELAVL1	CDKN2A	ATP5F1A
			IFNG	CAPN1			C9orf72				IFNG			BUD23	ELF3-AS1	CDKN2B-AS1	ATP5F1B
			IGBP1	CAPN2			CA2				IFNGR1			BZW1	ELOB	CDKN3	ATP5F1C
			IGF1	CAPN3			CACNA1B				IFNGR2			C1orf35	ELOC	CDR1	ATP5F1E
			IGF1R	CAPRIN1			CACNA1E				IGF2-AS			C1QBP	EMC2	CDX2	ATP5IF1
			IGF2	CARD16			CACNA1S				IGF2BP1			C1QTNF9	EMP1	CEACAM1	ATP5MF
			IGF2BP3	CARMIL2			CACNG2				IGF2BP3			C3	EMSLR	CEACAM3	ATP5MK
			IGFBP3	CASC15			CACNG3				IKBKB			C9orf72	ENO1	CEACAM4	ATP5PB
			IGFBP5	CASC2			CACNG4				IKBKE			CAAP1	ENO2	CEACAM5	ATP5PD
			IKBKE	CASC9			CACNG5				IKBKG			CAB39	ENSG00000229694	CEACAM6	ATP5PO
			IKBKG	CASK			CACNG7				IL18BP			CACYBP	ENSG00000271806	CEACAM8	ATP6V0A2
			IKZF3	CASP1			CACNG8				IL1A			CAD	EOLA2-DT	CEMP1	ATP7A
			IL10	CASP10			CACYBP				IL24			CALCA	EP300	CENPA	ATP7B
			IL11	CASP2			CAD				IL32			CALCOCO1	EPAS1	CENPB	ATP8A1
			IL17A	CASP3			CALCRL				IL33			CALCOCO2	EPHA2	CEP290	ATR
			IL1A	CASP4			CALM1				IL37			CALM1	ERBB2	CEP83	ATRAID
			IL1B	CASP6			CALM2				IL4			CALM2	ERCC6	CEP85L	ATRIP
			IL1RAP	CASP7			CALM3				ILIA			CALML5	ERH	CERNA3	ATXN10
			IL2	CASP8			CALML3				ILIB			CALR	ERVW-1	CERS5	ATXN2
			IL3	CASP9			CALML4				INFAIP3			CALU	ESR1	CES1	ATXN2L
			IL4	CASQ2			CALML5				IPMK			CAMK2A	ETFA	CETP	ATXN3
			IL6	CAST			CALML6				IQSEC1			CAMK2D	ETV4	CFB	AURKA
			ILK	CAT			CALR				IRAK1			CAMK2G	EWSR1	CFH	AURKAIP1
			INHBB	CAV1			CAMP				IRF3			CAMKK2	EZH2	CFHR3	AURKB
			INS	CAV2			CANT1				IRF9			CAND1	FABP1	CFHR5	AVEN
			INSR	CAV3			CANX				IRX2-DT			CANX	FABP4	CFI	AVP
			IQGAP1	CAVIN1			CAPN1				ITGB1-DT			CAPN1	FADS2	CFLAR	AXIN1
			IRF6	CBFB			CAPN2				ITPK1			CAPN2	FALEC	CFP	AXIN2
			IRS1	CBL			CAPN3				IVNS1ABP			CAPNS1	FAM106A	CGA	AXL
			IRX1	CBLB			CAPN5				JAK1			CAPRIN1	FAM120A	CGAS	AZU1
			ISM1	CBS			CARD14				JAK2			CAPZB	FAM225A	CGB3	B2M
			ITGA2	CBX3			CASP1				JAK3			CARD17P	FANCD2	CGB5	B4GALT1
			ITGA3	CBX5			CASP3				JNK			CARM1	FARSB	CHAT	B4GALT6
			ITGA4	CCAR1			CASP8				JUN			CARS1	FASN	CHD4	BABAM2
			ITGA5	CCAR2			CASP9				KCNQ1OT1			CASC2	FAT1	CHEK2	BABAM2-AS1
			ITGA6	CCAT1			CASQ1				KCTD5			CASC9	FBLN1	CHGA	BACE1
			ITGA8	CCBE1			CAT				KEAP1			CASP1	FBXO31	CHKA	BACH1
			ITGAV	CCDC88C			CATSPER1				KHDRBS1			CASP14	FBXW7	CHKB-CPT1B	BACH2
			ITGB1	CCK			CATSPER2				KIAA1191			CASP2	FCN3	CHRM1	BAD
			ITGB1BP1	CCL2			CAV1				KIF11			CASP3	FDFT1	CHRM2	BAG1
			ITGB2	CCL3			CAV3				KL			CASP4	FDX1	CHRM3	BAG2
			ITGB3	CCL4			CAVIN1				KLF6			CASP6	FFAR2	CHRNA1	BAG3
			ITGB4	CCN1			CBL				KLHDC10			CASP7	FGD5-AS1	CHRNA7	BAG4
			ITGB5	CCN2			CBLIF				KRT1			CASP8	FGF21	CIITA	BAG5
			ITGBL1	CCNA1			CBLL1				KRT10			CASP9	FGF4	CKAP2	BAG6
			ITPRIP	CCNA2			CBS				KRT14			CASR	FGFR1	CKM	BAIAP2L1
			IVL	CCNB1			CCDC115				KRT16			CAT	FGFR4	CLDN11	BAK1
			JAG1	CCNB2			CCDC169-SOHLH2				KRT18			CAV1	FH	CLDN3	BANCR
			JUN	CCNB3			CCDC78				KRT19			CAVIN1	FHL2	CLDN6	BAP1
			JUP	CCND1			CCDC91				KRT2			CBL	FHOD1	CLEC12A	BARD1
			KDM3A	CCND2			CCK				KRT5			CBS	FKBP2	CLEC4A	BASP1
			KDR	CCND3			CCL2				KRT6A			CBX3	FKBP3	CLEC4D	BATF2
			KEAP1	CCNE1			CCL20				KRT7			CCAR1	FLT3	CLEC7A	BAX
			KHDRBS3	CCNE2			CCL3				KRT8			CCAR2	FMR1	CLEC9A	BAZ2B
			KHSRP	CCNF			CCL4				KRT86			CCAT1	FOSL2	CLIP1	BBC3
			KIF14	CCNG1			CCL5				KRT9			CCDC115	FOXA2	CLPP	BBOX1-AS1
			KIF18A	CCNH			CCN2				LACTB			CCDC12	FOXC1	CLPX	BCAP31
			KIF2A	CCNO			CCN6				LAMP2			CCDC47	FOXC2-AS1	CLU	BCAR1
			KITLG	CCNT1			CCNA1				LARP1			CCDC50	FOXD1-AS1	CMKLR1	BCAR4
			KL	CCP110			CCNA2				LASTR			CCDC86	FOXI2	CMTM6	BCL10
			KLF12	CCPG1			CCNB1				LCMT1-AS1			CCDC88A	FOXI3	CNBP	BCL11A
			KLF4	CCR1			CCND1				LCN2			CCL2	FOXK1	CNP	BCL11B
			KLF5	CCR6			CCNL2				LEF1			CCL5	FOXK2	CNR2	BCL2
			KMT2A	CCR7			CCR2				LENG8-AS1			CCN1	FOXN4	CNTN2	BCL2A1
			KRAS	CCT3			CCR5				LGALS1			CCN2	FOXO1	COL17A1	BCL2L1
			KRT10	CD151			CCR6				LGALS3			CCNA2	FPR2	COL2A1	BCL2L10
			KRT14	CD163			CCR7				LIMCH1			CCNB1	FSCN1	COL3A1	BCL2L11
			KRT15	CD19			CCRL2				LINC00336			CCND1	FTH1	COL4A3	BCL2L12
			KRT17	CD22			CCT3				LINC00339			CCND3	FTL	COL4A4	BCL2L13
			KRT18	CD274			CCT4				LINC00426			CCNF	FTMT	COL4A5	BCL2L14
			L1CAM	CD276			CCT5				LINC00472			CCNY	FUNDC1	COL5A1	BCL2L15
			LAMA1	CD28			CCT7				LINC00511			CCPG1	FUS	COL7A1	BCL2L2
			LAMA3	CD2AP			CCT8				LINC00539			CCR5	FXN	COMP	BCL2L2-PABPN1
			LAMA5	CD33			CCZ1				LINC00665			CCT2	FXR1	COMT	BCL3
			LAMB1	CD34			CCZ1B				LINC00861			CCT3	FXYD6	COPA	BCL6
			LAMB3	CD36			CD163				LINC00900			CCT4	FZD7	COPG2	BCL7A
			LAMC1	CD38			CD164				LINC00920			CCT5	G0S2	COTL1	BCL7B
			LAMC2	CD4			CD19				LINC00941			CCT6A	G3BP1	CP	BCL7C
			LATS1	CD40			CD1B				LINC01060			CCT7	G6PD	CPA1	BCLAF1
			LATS2	CD40LG			CD1C				LINC01094			CCT8	GABARAPL1	CPA6	BCLAFI
			LCK	CD44			CD1D				LINC01215			CCZ1	GABPB1	CPQ	BCOR
			LDHA	CD47			CD1E				LINC01237			CD209	GABPB1-AS1	CR1	BCR
			LEF1	CD55			CD209				LINC01303			CD24	GALNT14	CR2	BCYRN1
			LGALS1	CD58			CD27				LINC01355			CD274	GAS5	CREB1	BDH2
			LGALS3	CD59			CD274				LINC01480			CD36	GASAL1	CREB3	BDKRB2
			LGALS8	CD63			CD276				LINC01503			CD4	GATA3	CREBBP	BDNF
			LIF	CD68			CD28				LINC01638			CD40LG	GCH1	CRHBP	BDNF-AS
			LINC00324	CD69			CD300A				LINC01672			CD44	GCLC	CRK	BECN1
			LINC00355	CD70			CD34				LINC01679			CD46	GCLM	CRMA	BECNI
			LINC00958	CD80			CD36				LINC01833			CD47	GCN1	CRPPA	BEX1
			LINC01297	CD82			CD38				LINC01857			CD5L	GDNF-AS1	CRTC1	BEX2
			LINC01546	CD83			CD3G				LINC01871			CD63	GDPD5	CRYAA	BEX3
			LINC01672	CD86			CD4				LINC01936			CD82	GFRA1	CRYAB	BFAR
			LINC02605	CD8A			CD40				LINC02446			CD84	GGT1	CRYM	BGLAP
			LINC02820	CD9			CD40LG				LINC02576			CDAN1	GJA1	CSDE1	BGN
			LINCMD1	CD99			CD44				LINC02605			CDC25B	GLS2	CSF1	BHLHE40
			LINC-ROR	CDC123			CD5				LINC02773			CDC34	GMDS-DT	CSF1R	BHLHE41
			LMO3	CDC14A			CD55				LINC02905			CDC37	GNAS	CSF2	BICDL3P
			LPAR1	CDC14B			CD63				LINC02909			CDC42	GNB1	CSF3	BID
			LPCAT1	CDC16			CD68				LINC03058			CDH1	GNB3	CSN1S1	BIK
			LRP1	CDC20			CD69				LINC-PINT			CDH6	GOLGA4	CSN2	BIN1
			LTA	CDC23			CD74				LINC-ROR			CDIP1	GOLPH3	CSN3	BIRC2
			LTB4R2	CDC25A			CD79A				LINP1			CDK1	GOT1	CSNK2A1	BIRC3
			LTF	CDC25B			CD80				LITAF			CDK16	GOTI	CSNK2A2	BIRC5
			LYPD1	CDC25C			CD81				LMNA			CDK2	GPD2	CSPG4	BIRC6
			MAD2L1	CDC26			CD82				LNCAROD			CDK4	GPI	CTAG1A	BIRC7
			MALAT1	CDC27			CD84				LNCOG			CDK5	GPM6A	CTAG1B	BIRC8
			MAOA	CDC34			CD86				LNCTAM34A			CDK5R1	GPX1	CTAG2	BLACAT1
			MAP1LC3A	CDC37			CD8A				LRP1			CDK5RAP3	GPX2	CTCF	BLCAP
			MAP2K1	CDC37L1			CD9				LRRC59			CDK6	GPX3	CTCFL	BLID
			MAP2K2	CDC40			CDC42				LRRFIP2			CDK7	GPX4	CTLA4	BLK
			MAP2K3	CDC42			CDCA5				LTBP1			CDK9	GRIK1-AS2	CTNNA1	BLM
			MAP2K4	CDC45			CDH1				LTBR			CDKN1A	GRK4	CTNNB1	BLNK
			MAP3K1	CDC5L			CDH17				LZTS3			CDKN1B	GRN	CTSD	BLOCIS2
			MAP3K14	CDC6			CDH2				MAIP1			CDKN2A	GSDMD	CTSG	BLVRB
			MAP3K7	CDC7			CDH23				MALAT1			CDKN2B-AS1	GSK3B	CTSH	BLZF1
			MAP3K8	CDC73			CDIP1				MALINC1			CDR1-AS	GSS	CTSL	BMAL1
			MAPK1	CDCA2			CDK1				MAP1B			CEBPB	GSTM3	CTSS	BMF
			MAPK10	CDCA4			CDK2				MAP1LC3A			CEBPZ	GSTP1	CTSV	BMI1
			MAPK11	CDCA5			CDK4				MAP3K14-AS1			CENPK	GSTZ1	CUL4B	BMP1
			MAPK14	CDCA7			CDK5				MAP3K7			CEP131	GUCY1A1	CWC27	BMP10
			MAPK3	CDCA7L			CDKN1A				MAPK1			CEP170	H1-1	CXADR	BMP2
			MAPK8	CDCA8			CDKN2A				MAPK14			CERKL	H1-10	CXCL1	BMP3
			MARCHF2	CDCP1			CDR1-AS				MAPK3			CERNA3	H1-10-AS1	CXCL10	BMP4
			MAVS	CDH1			CDX2				MAPK8			CERS1	H1-2	CXCL11	BMP5
			MCAM	CDH17			CEACAM1				MAPKAPK2			CERS2	H1-3	CXCL12	BMP6
			MCF2	CDH2			CEMIP				MAPT			CETN1	H1-4	CXCL2	BMP7
			MCL1	CDH3			CEP290				MAPT-AS1			CFAP20	H1-5	CXCL5	BMP8A
			MDK	CDH5			CERNA3				MEF2C-AS1			CFL1	H19	CXCL8	BMPR1A
			MDM2	CDK1			CERS1				MEFV			CFLAR	H2AC1	CXCL9	BMPR1B
			ME1	CDK11A			CES1				MEG3			CFTR	H2AC21	CXCR2	BMPR2
			MEG3	CDK11B			CFH				MERTK			CFTR-AS1	H2AX	CXCR3	BMPRIB
			MEGF11	CDK12			CFL2				METTL3			CGAS	H2BC12	CXCR4	BMX
			MERTK	CDK2			CFLAR				MGA			CHAF1A	H3P16	CXCR5	BNIP1
			MET	CDK20			CFTR				MIB2			CHAF1B	H4C1	CYB5R3	BNIP2
			MFGE8	CDK3			CGAS				MIF			CHCHD10	HACE1	CYCS	BNIP3
			MGAT5	CDK4			CHAT				MIR101-1			CHCHD3	HADHA	CYP19A1	BNIP3L
			MIA	CDK5			CHCHD10				MIR101-2			CHEK1	HADHB	CYP1A1	BNIPL
			MID1	CDK5R1			CHEK1				MIR10B			CHEK2	HAGLROS	CYP1A2	BOK
			MIR107	CDK5RAP2			CHEK2				MIR1-1			CHERP	HAMP	CYP21A2	BRAF
			MIR10A	CDK5RAP3			CHGA				MIR1244-3			CHKB-CPT1B	HAT1	CYP24A1	BRAT1
			MIR1229	CDK6			CHID1				MIR125A			CHMP1A	HCAR1	CYP2A6	BRCA1
			MIR124-1	CDK7			CHIT1				MIR1306			CHMP1B	HCFC1	CYTOR	BRCA2
			MIR124-3	CDK9			CHKB				MIR133B			CHMP2A	HCFC2	DANCR	BRD4
			MIR1247	CDKN1A			CHMP1A				MIR137			CHMP2B	HCG18	DBH	BRD7
			MIR1248	CDKN1B			CHMP1B				MIR139			CHMP3	HCRT	DCAF12	BRD8
			MIR125A	CDKN1C			CHMP2A				MIR141			CHMP4A	HDAC10	DCAF6	BRD9
			MIR1269A	CDKN2A			CHMP2B				MIR146B			CHMP4B	HDDC3	DCLK1	BRI3BP
			MIR132	CDKN2B			CHMP3				MIR148A			CHMP4BP1	HDLBP	DCN	BRMS1
			MIR133B	CDKN2B-AS1			CHMP4A				MIR155			CHMP4C	HECTD3	DCT	BRSK2
			MIR138-1	CDKN2C			CHMP4B				MIR16-1			CHMP5	HECW1	DDAH1	BRWD1
			MIR138-2	CDKN2D			CHMP4BP1				MIR16-2			CHMP6	HEIH	DDB1	BSCL2
			MIR141	CDKN3			CHMP4C				MIR181A2			CHMP7	HELLS	DDR1	BSG
			MIR144	CDSN			CHMP5				MIR181B1			CHP1	HEPFAL	DDX3X	BST2
			MIR145	CDT1			CHMP6				MIR181C			CHRD	HIF1A	DDX3Y	BTBD10
			MIR146A	CDX2			CHMP7				MIR181D			CHRM1	HILPDA	DDX43	BTC
			MIR146B	CEACAM1			CHPT1				MIR183			CHUK	HIPK3	DEFA1	BTF3
			MIR147B	CEACAM3			CHRNA1				MIR193A			CIP2A	HIVEP3	DEK	BTG1
			MIR148B	CEACAM5			CHRNB1				MIR200A			CISD1	HJURP	DELEC1	BTG2
			MIR15A	CEBPA			CHRND				MIR21			CISD2	HK2	DEPDC1	BTG3
			MIR181A1	CEBPB			CHRNE				MIR211			CKAP4	HLF	DES-LCR	BTK
			MIR181D	CEMIP2			CHRNG				MIR214			CKB	HMGB1	DHFR	BTRC
			MIR1827	CEND1			CHST14				MIR215			CKM	HMGB3	DHX9	BUB1
			MIR18A	CENPA			CHUK				MIR216A			CLCN3	HMGCL	DIRC3	BUB1B
			MIR193A	CENPC			CIITA				MIR22			CLDN1	HMGCR	DLAT	BUB3
			MIR196A2	CENPE			CISC				MIR221			CLDN2	HMGCS1	DLD	BUD23
			MIR19A	CENPF			CISE				MIR223			CLDN5	HMGN1	DLEU2	BYSL
			MIR19B1	CENPJ			CISG				MIR224			CLEC16A	HMOX1	DMD	BZW2
			MIR200A	CENPT			CISH				MIR29B1			CLEC4A	HNF4A	DNAAF6	C11orf65
			MIR200B	CEP131			CIZ1				MIR3163			CLINT1	HNRNPA1	DNAH8	C19orf33
			MIR200C	CEP135			CKAP4				MIR3182			CLN3	HNRNPA2B1	DNAJA2	C1D
			MIR203A	CEP164			CKB				MIR320A			CLN5	HNRNPA3	DNAJB1	C1GALT1C1
			MIR204	CEP192			CKM				MIR324			CLN6	HNRNPC	DNAJB1P1	C1QA
			MIR206	CEP250			CKMT1B				MIR325			CLOCK	HNRNPD	DNAJB7	C1QBP
			MIR20A	CEP290			CKMT2				MIR326			CLPP	HNRNPL	DNAJC2	C1QTNF3
			MIR20B	CEP55			CLCN1				MIR331			CLPTM1	HNRNPM	DNASE1	C1QTNF9
			MIR21	CEP57			CLCN3				MIR34C			CLPTM1L	HOTAIR	DNMT3A	C3
			MIR211	CEP63			CLCN4				MIR369			CLRN1-AS1	HOTAIRM1	DPEP1	C3orf38
			MIR214	CEP70			CLCN5				MIR373			CLTA	HOXA11-AS	DPP4	C4BPB
			MIR215	CEP78			CLCN6				MIR376B			CLTC	HOXB-AS2	DPPA2	C5
			MIR221	CEP85L			CLCN7				MIR379			CLTCL1	HOXB-AS3	DSCAM-AS1	C5AR1
			MIR222	CERNA3			CLDN16				MIR381			CLU	HOXB-AS4	DSE	C6orf120
			MIR223	CETN2			CLEC16A				MIR383			CMSS1	HP	DSG1	CA2
			MIR23B	CFH			CLEC4M				MIR3924			CNN1	HPCAL1	DSG3	CA4
			MIR25	CFI			CLEC7A				MIR3936HG			CNOT1	HRNR	DST	CA9
			MIR26A1	CFL1			CLN3				MIR425			CNOT4	HSBPI	DUSP12	CAAP1
			MIR27B	CFLAR			CLN5				MIR4286			COL10A1	HSDL2	DUSP22	CAB39
			MIR296	CFTR			CLN6				MIR4443			COL18A1	HSP90AA1	DUSP5	CAB39L
			MIR30B	CGA			CLN8				MIR4458			COL1A1	HSP90B1	DYSF	CABIN1
			MIR30C1	CGAS			CLNK				MIR448			COL3A1	HSPA5	E2F1	CABLES1
			MIR3126	CHAT			CLNS				MIR4485			COL6A1	HSPA8	EBNA1BP2	CABYR
			MIR33B	CHD1			CLTA				MIR485			COL8A2	HSPA9	ECI2	CACFD1
			MIR363	CHD3			CLTB				MIR494			COMT	HSPB1	ECM1	CACNA1C
			MIR373	CHD4			CLTC				MIR495			COPA	HSPG2	EDN2	CACNA1H
			MIR378E	CHD7			CLTCLI				MIR496			COPB1	HTR1D	EDN3	CACNA2D2
			MIR381	CHEK1			CLU				MIR497HG			COPB2	HTR2B	EDNRA	CACNA2D3
			MIR424	CHEK2			CLVS1				MIR498			COPG1	HULC	EDNRB	CACUL1
			MIR4454	CHFR			CLVS2				MIR500A			COPS5	HUWE1	EEA1	CACYBP
			MIR450A1	CHGA			CNGA1				MIR519D			COPS8	IBA57	EED	CAD
			MIR451A	CHMP2B			CNGB1				MIR522			COPZ1	ID1	EEF1A1	CADM1
			MIR4775	CHMP3			CNNM4				MIR532			CPD	ID3	EEF1D	CALB1
			MIR494	CHMP4B			CNP				MIR543			CPOX	IDH1	EEF2	CALB2
			MIR497	CHMP7			CNTN1				MIR592			CPS1	IDH2	EGF	CALCA
			MIR503	CHRM2			CNTNAP1				MIR655			CPSF3	IDO1	EGFR	CALCOCO2
			MIR507	CHUK			COA7				MIR6848			CPT1A	IFITM9P	EGR1	CALCR
			MIR522	CIB1			COL11A2				MIR6852			CPT2	IFNG	EGR2	CALCRL
			MIR525	CIC			COL12A1				MIR7-1			CPTP	IGF2BP1	EHF	CALM1
			MIR590	CIDEA			COL13A1				MIR7-3HG			CPVL	IGF2BP2	EIF1AD	CALM2
			MIR630	CILK1			COL18A1				MIR9-3HG			CPZ	IGF2BP3	EIF2A	CALM3
			MIR638	CISH			COL1A1				MIR96			CREB1	IGFBP7	EIF2AK2	CALR
			MIR655	CITED2			COL1A2				MIR98			CREBBP	IGHG1	EIF2AK3	CALU
			MIR6744	CIZ1			COL2A1				MKRN1			CREG1	IGHG4	EIF2AK3-DT	CAMK1D
			MIR7-1	CKAP2L			COL4A1				MLF2			CRMA	IGKC	EIF2AK4	CAMK2A
			MIR7-3HG	CKAP5			COL4A2				MLKL			CRNKL1	IGKV1-5	EIF2S1	CAMK2B
			MIR9-1	CKB			COL4A3				MMP13			CRX	IGKV2-40	EIF4EBP1	CAMK2D
			MIR92A1	CKM			COL6A1				MORF4L2-AS1			CRY1	IGKV2D-40	ELANE	CAMK2G
			MIR92A2	CKS1B			COL6A2				MPP1			CRYAB	IGKV3D-20	ELAVL2	CAMK4
			MIR93	CLASP1			COL6A3				MPRIP			CRYBA1	IGLV3-19	ELAVL3	CAMKK1
			MIR99A	CLASP2			COLEC12				MRE11			CS	IKBKG	ELAVL4	CAMLG
			MMP11	CLCF1			COLQ				MRPS12			CSDE1	IL1B	ELK3	CAMP
			MMP13	CLCN1			COMP				MSC-AS1			CSE1L	IL4I1	ELN	CAND1
			MMP2	CLCN7			COPB1				MTOR			CSF1	IL6	ELOF1	CANX
			MMP3	CLIP1			COPG1				MT-RNR2			CSF1R	ILF3-DT	EMCN	CAP1
			MMP7	CLN3			COQ2				MT-TK			CSNK1A1	INKA2-AS1	EMD	CAPN1
			MMP8	CLN6			COQ8A				MT-TP			CSNK2A1	INSR	EMSLR	CAPN10
			MMP9	CLPB			CORO1A				MTX1			CSNK2A2	IRAG1-AS1	EN1	CAPN14
			MNX1	CLTC			CORO1C				MTX2			CSNK2B	IREB2	EN2	CAPN2
			MOB2	CLU			COX20				MVP			CSRP2	IRF1	ENG	CAPN3
			MPO	CNOT3			COX6A1				MYC			CSTA	IRF8	ENO1	CAPN6
			MRTFA	CNOT9			COX6A2				MYCBP			CSTB	ISCA2	ENO2	CAPN9
			MSLN	CNP			CP				MYCNOS			CSTF1	ISYNA1	ENOPH1	CAPNS1
			MST1	CNR1			CPLX2				MYD88			CSTF3	ITCH	ENTR1	CAPRIN1
			MST1R	CNTF			CPQ				MYH14			CT55	ITGA6	EPAS1	CAPZA1
			MTA1	CNTN1			CPT2				MYH9			CTF1	ITGB1-DT	EPCAM	CAPZA2
			MTDH	CNTN2			CR2				MYL12A			CTHRC1	ITGB2-AS1	EPHA2	CAPZB
			MTOR	COASY			CREB1				MYL6			CTNNB1	ITGB5	EPHB2	CARD10
			MT-RNR1	COG7			CREBBP				MYL6B			CTNND1	ITGB8	EPHB4	CARD11
			MT-RNR2	COL11A2			CREG1				MYO1B			CTPS1	ITIH3	EPO	CARD14
			MT-TF	COL17A1			CRP				MYO1C			CTSA	JAM3	EPRS1	CARD16
			MT-TL1	COL18A1			CRPPA				MYO1D			CTSB	JUN	EPS8	CARD18
			MT-TP	COL1A1			CRTC1				MYO1D-DT			CTSC	KAT2A	ERAP1	CARD6
			MT-TT	COL1A2			CRYAB				MYO5A			CTSD	KAT5	ERBB2	CARD8
			MT-TY	COL2A1			CSE1L				MYO6			CTSK	KBTBD3	ERBB3	CARD9
			MUC1	COL3A1			CSF1				MYOSLID			CTSL	KCNQ1OT1	ERBB4	CARM1
			MUC13	COL4A1			CSF1R				NAT1			CTSS	KDM1A	ERGIC3	CARMN
			MUC4	COL4A2			CSF2				NAT2			CTSZ	KDM3B	ERO1A	CASC15
			MYBBP1A	COL5A1			CSF3				NCK1-DT			CTTN	KDM4A	ERV3-1	CASC2
			MYC	COL6A1			CSF3R				NCL			CTU2	KDM5C	ERVW-1	CASC9
			MYH9	COL6A2			CSNK2A1				NDUFA4			CUL1	KEAP1	ETS1	CASK
			MYO5A	COL6A3			CSNK2A2				NDUFA6-DT			CUL2	KEAPI	EXOSC5	CASP1
			NADK	COL7A1			CSPG4				NFAT5			CUL3	KHDRBS1	EXT1	CASP10
			NAMPT	COMT			CSPG5				NFE2L2			CUL4A	KIAA1614	EZH2	CASP12
			NAT1	COPS5			CSRP3				NFKB1			CUL4B	KLB	F10	CASP14
			NBAT1	COQ2			CST3				NFKBIA			CUL5	KLF11	F11R	CASP16P
			NCOA3	COQ8A			CST7				NFS1			CUX1	KLF15	F13A1	CASP1P1
			NDN	COX15			CSTB				NFYA			CXCL1	KLF2	F2	CASP1P2
			NDRG1	COX5A			CTBS				NGFR			CXCL12	KLHDC2	F2R	CASP1P3
			NEDD4L	COX6B1			CTDP1				NINJ1			CXCL8	KPNA2	F2RL1	CASP2
			NFE2L2	CP			CTLA4				NINJ2			CXCR4	KPNB1	F3	CASP3
			NFKB1	CPOX			CTNNB1				NLRP2			CYB5A	KPRP	F5	CASP3P1
			NFKB2	CPS1			CTNND1				NLRP3			CYB5R3	KRAS	F8	CASP4
			NGF	CPT2			CTNS				NLRP7			CYC1	KRT1	F9	CASP4LP
			NGFR	CR1			CTNS-AS1				NME8			CYCS	KRT10	FABP12	CASP5
			NKX2-1	CR2			CTSA				NOD2			CYFIP1	KRT14	FABP7	CASP6
			NKX3-1	CRADD			CTSB				NOX2			CYLD	KRT16	FAH	CASP7
			NME1	CRBN			CTSC				NOX4			CYP2E1	KRT17	FAM138B	CASP8
			NMU	CREB1			CTSD				NPM1			CYTOR	KRT18	FANCD2	CASP8AP2
			NNT	CREB3			CTSE				NPTN-IT1			DAB2	KRT19	FAP	CASP9
			NOS2	CREBBP			CTSF				NQO1			DACT1	KRT2	FAS	CASPI
			NOS3	CRIPT			CTSG				NR1H4			DANCR	KRT5	FAS-AS1	CASR
			NOTCH1	CRIPTO			CTSH				NR4A1			DAO	KRT6A	FASLG	CAST
			NOTCH3	CRK			CTSI:				NRIP1			DAP	KRT6B	FAT3	CASZ1
			NOTCH4	CRKL			CTSK				NSMCE1-DT			DAPK1	KRT9	FBL	CAT
			NOX4	CRP			CTSL				NSUN2			DAPK2	KSR2	FBLN1	CAV1
			NQO1	CRX			CTSO				NUDT21			DAPK3	KTN1-AS1	FBXO39	CAV2
			NR4A1	CRYAB			CTSS				NUP214			DAPL1	LACTB	FBXO9	CAVIN2
			NR4A2	CSF1			CTSV				NUTM2B-AS1			DARS1	LAMP2	FCAR	CAVIN3
			NR4A3	CSF1R			CTSW				OBI1			DAXX	LAMTOR5	FCER2	CBFB
			NRAS	CSF2			CTSZ				OGT			DBN1	LANCL2	FCGR1A	CBL
			NRF1	CSF3			CTTN				OIP5-AS1			DCAF1	LASP1	FCGR2B	CBLB
			NRP1	CSF3R			CUBN				OPA1			DCAF12	LASTR	FCGR2C	CBR1
			NTF3	CSK			CUL3				OPTN			DCAF13	LCAL1	FCGR3A	CBR3-AS1
			NTF4	CSNK1A1			CUL4B				OTUD1			DCAF17	LCN2	FCGR3B	CBS
			NTRK1	CSNK1D			CXCL1				OTUD4			DCN	LCP2	FCGRT	CBX4
			NTRK2	CSNK1E			CXCL10				OTUD6B-AS1			DCP2	LDHA	FCN2	CCAR1
			NTRK3	CSNK2A1			CXCL12				OTULIN			DCST1-AS1	LDHB	FENDRR	CCAR2
			NUDT1	CSNK2A2			CXCL13				PABPC1			DCTN1	LGALS1	FGA	CCAT1
			NUMBL	CSNK2B			CXCL8				PABPN1			DCTPP1	LGALS3	FGF1	CCAT2
			OAS2	CST3			CXCL9				PADI4			DDA1	LGMN	FGF13	CCDC134
			OCLN	CSTB			CXCR3				PAK1			DDB1	LIFR	FGF2	CCDC26
			OFCC1	CTBP1			CXCR4				PALMD			DDIT3	LINC00092	FGF20	CCDC47
			OGT	CTC1			CXCR5				PANX1			DDIT4	LINC00205	FGF4	CCDC8
			OLFM3	CTCF			CYB561				PARK7			DDIT4L	LINC00239	FGF5	CCDC88A
			ONECUT1	CTLA4			CYB561A3				PARP1			DDOST	LINC00240	FGF9	CCDC88B
			PAK1	CTNNA1			CYCS				PAWR			DDRGK1	LINC00242	FGFR1	CCK
			PAK2	CTNNB1			CYP11A1				PAXIP1-AS2			DDX1	LINC00324	FGFR2	CCKBR
			PAK3	CTNNBL1			CYP17A1				PCBP1			DDX10	LINC00336	FGFR3	CCL11
			PAK4	CTNND1			CYP19A1				PCM1			DDX17	LINC00339	FGFR4	CCL15-CCL14
			PAK6	CTNND2			CYP1A1				PDCD6IP			DDX20	LINC00342	FH	CCL19
			PARK7	CTNS			CYP21A2				PDE2A-AS2			DDX21	LINC00426	FHIT	CCL2
			PARP1	CTPS1			CYP27A1				PDIA4			DDX23	LINC00449	FIBCD1	CCL20
			PBK	CTSB			CYP2E1				PDIA6			DDX27	LINC00460	FKBP5	CCL21
			PCA3	CTSD			CYP3A4				PDLIM7			DDX39A	LINC00462	FKRP	CCL25
			PCMT1	CTSK			CYP4V2				PELI1			DDX39B	LINC00472	FLNB	CCL26
			PCNA	CTSL			CYP51A1				PFKL			DDX3X	LINC00473	FLT3	CCL27
			PDCD4	CTSS			DAB2				PGAM4			DDX46	LINC00511	FLT3LG	CCL3
			PDCD6IP	CTTN			DAG1				PGAM5			DDX47	LINC00520	FMR1-AS1	CCL4
			PDGFB	CUL1			DAGLB				PGLYRP1			DDX5	LINC00538	FN1	CCL5
			PDGFRA	CUL2			DAPK1				PGR-AS1			DDX54	LINC00616	FNBP1	CCL7
			PDGFRB	CUL3			DAZ1				PIK3R3			DDX55	LINC00632	FOLH1	CCL8
			PDK1	CUL4A			DAZL				PIKFYVE			DDX6	LINC00648	FOLR1	CCM2
			PDK4	CUL4B			DCN				PINK1			DEK	LINC00649	FOS	CCN1
			PDPK1	CUL7			DCT				PITPNA			DELE1	LINC00664	FOXP3	CCN2
			PECAM1	CUX1			DCTN1				PKM			DELEC1	LINC00665	FPR1	CCN3
			PELP1	CWF19L2			DCTN2				PKP2			DENND3	LINC00673	FURIN	CCN4
			PF4	CXADR			DCX				PKP3			DEPDC5	LINC00680	FUS	CCNA1
			PHB1	CXCL1			DDB1				PLA2G4			DEPP1	LINC00702	FUT4	CCNA2
			PHLDA1	CXCL10			DDB2				PLEC			DEPPI	LINC00844	FUT8	CCNB1
			PHLDA2	CXCL12			DDIT3				PLEKHA5			DEPTOR	LINC00886	FYN	CCNB2
			PIK3C2B	CXCL13			DDOST				PLK1			DERL1	LINC00908	G6PC2	CCNC
			PIK3CA	CXCL8			DDR2				PLS3-AS1			DFFA	LINC00926	G6PD	CCND1
			PIK3CB	CXCR1			DDX39A				PNKD			DHCR7	LINC00941	GAA	CCND2
			PIK3CG	CXCR2			DDX3X				PNN			DHRSX	LINC00944	GACAT2	CCND3
			PIK3R1	CXCR4			DDX4				POF1B			DHX15	LINC00958	GAD1	CCNE1
			PIK3R2	CXCR5			DEF8				PPIA			DHX16	LINC00963	GAD2	CCNE2
			PIK3R3	CYB5R3			DEGS1				PPID			DHX30	LINC00968	GAGE1	CCNF
			PIMREG	CYBA			DENND3				PPM1B			DHX36	LINC00996	GAL	CCNG1
			PIN1	CYBB			DEPDC5				PPP1CB			DHX37	LINC01004	GALNT1	CCNG2
			PIP5K1C	CYCS			DEPTOR				PPP1R12C			DHX9	LINC01060	GALNT13	CCNH
			PITPNC1	CYLD			DERL1				PPP1R3G			DIABLO	LINC01063	GALT	CCNL2
			PLA2G1B	CYP17A1			DES				PPP3CB-AS1			DIAPH3	LINC01093	GANAB	CCNT1
			PLAT	CYP19A1			DGUOK				PPP6C			DICER1	LINC01094	GAPDH	CCR1
			PLAU	CYP1A1			DHCR7				PRDX1			DIDO1	LINC01133	GAPDHS	CCR2
			PLAUR	CYP1A2			DHFR				PREB			DIRAS1	LINC01139	GAS5	CCR3
			PLG	CYP27A1			DHFR2				PRIMPOL			DIRAS3	LINC01191	GAS6	CCR5
			PLK1	CYP27B1			DHTKD1				PRKAA1			DKC1	LINC01215	GAST	CCR6
			PLK4	CYP2A6			DIAPH1				PRKAA2			DKK1	LINC01224	GATA2	CCR7
			PML	CYP2C19			DICER1				PRKN			DLEU1	LINC01436	GATA4	CCR8
			PON2	CYP2E1			DKC1				PRMT1			DLEU2	LINC01446	GATAD2A	CCR9
			PPARG	CYP3A4			DLAT				PRPF40A			DLST	LINC01503	GATAD2B	CCT2
			PPM1F	CYP7B1			DMD				PRPF8			DLX6-AS1	LINC01508	GBA1	CCT3
			PPME1	CYREN			DMRT1				PRPS1			DMXL2	LINC01550	GBA2	CCT4
			PPP1R13B	CYTOR			DNA2				PRR7-AS1			DNAH8	LINC01554	GBA3	CCT5
			PPP2CA	DAB2IP			DNAH1				PRSS1			DNAJA1	LINC01558	GBP2	CCT6A
			PPP2R1A	DAD1			DNAH8				PSMA3			DNAJA2	LINC01579	GBP4	CCT7
			PPP2R2A	DAG1			DNAJA1				PSMC4			DNAJA3	LINC01614	GBP5	CCT8
			PPP2R2D	DANCR			DNAJA2				PTEN			DNAJB1	LINC01655	GC	CD14
			PPP2R5A	DAP			DNAJB2				PTGES3			DNAJB11	LINC01672	GCC2	CD151
			PRDM1	DAP3			DNAJB6				PTPN6			DNAJB12	LINC01767	GCG	CD163
			PRDX1	DAPK1			DNAJC13				PURPL			DNAJC10	LINC01833	GCLM	CD164
			PRDX4	DAPK2			DNAJC5				PVT1			DNAJC13	LINC01836	GCNT2	CD180
			PRDX6	DAPK3			DNASE1				PWAR4			DNAJC16	LINC01857	GDF15	CD19
			PRG2	DARS1			DNASE1L1				PYCARD			DNAJC3	LINC01871	GDF7	CD2
			PRKAA1	DARS2			DNASE1L2				PYG			DNAJC7	LINC01956	GFAP	CD22
			PRKAA2	DAXX			DNASE1L3				PYGM			DNAJC9	LINC02080	GGCX	CD24
			PRKACA	DBH			DNASE2				RAB4B-EGLN2			DNM1L	LINC02154	GGH	CD247
			PRKCA	DCK			DNASE2B				RAD23B			DNM2	LINC02257	GHR	CD27
			PRKCD	DCLRE1C			DNM2				RAI14			DNMIL	LINC02328	GHRH	CD274
			PRKCI	DCN			DNM3				RALBP1			DNMT1	LINC02432	GIP	CD276
			PRKCQ	DCTN1			DNMT1				RANBP2			DPP6	LINC02446	GIPC1	CD28
			PRKD1	DCTN2			DNMT3A				RAP2C-AS1			DPY30	LINC02541	GJA1	CD2AP
			PRNP	DCX			DNMT3B				RARA			DPYSL2	LINC02587	GLA	CD2-LCR
			PRP4K	DDB1			DNTT				RARG			DRAIC	LINC02605	GLB1	CD33
			PRPF8	DDB2			DOC2A				RB1			DRAM1	LINC02716	GLCE	CD34
			PRSS3	DDIT3			DOCK8				RBCK1			DRAM2	LINC02901	GLI2	CD36
			PTEN	DDR1			DOK7				RBCKI			DRAMI	LINC02908	GLO1	CD38
			PTGS2	DDR2			DPAGT1				RBM14			DRG1	LINC02910	GLP1R	CD3D
			PTHLH	DDX11			DPM1				RBM14-RBM4			DSC1	LINC02913	GLUD2	CD3E
			PTK2	DDX3X			DPM2				RBM25			DSG1	LINC03007	GNAS	CD3G
			PTK2B	DDX41			DPM3				RBMX			DSG2	LINC03122	GNAS-AS1	CD4
			PTK6	DDX5			DPP4				RCC2			DSP	LINC-PINT	GNLY	CD40
			PTK7	DEAF1			DPP7				RCN1			DST	LINC-ROR	GOLGA4	CD40LG
			PTPA	DEF6			DPY19L2				RELA			DUSP16	LINP1	GOLM1	CD44
			PTPN1	DEK			DPYD				RFWD3			DUSP4	LIPE-AS1	GP2	CD46
			PTPN11	DEPDC5			DRAM1				RHOXF2			DVL2	LMNB1	GP6	CD47
			PTPN12	DES			DRAM2				RIGI			DYNC1H1	LMO7DN	GPC3	CD48
			PTPN3	DFFA			DRD1				RIOK1			DYNC1I1	LNCTAM34A	GPI	CD5
			PTRH2	DGUOK			DROSHA				RIPK1			DYNC1I2	LOC130062887	GPR182	CD55
			PVT1	DHCR24			DRP2				RIPK2			DYNC1LI1	LOC654780	GPT	CD58
			PWAR1	DHCR7			DST				RIPK3			DYNC1LI2	LONP1	GPX8	CD59
			PXN	DHFR			DTNBP1				RIPKI			DYNLL1	LOXL1-AS1	GRAP2	CD5L
			PYCARD	DHODH			DTX3L				RMRP			DYNLL2	LPCAT3	GRASLND	CD63
			QSOX1	DHX9			DYM				RN7SL1			DYNLT1	LPIN1	GRN	CD69
			RAB1B	DIABLO			DYNC1H1				RNF139-DT			DYRK1B	LPIN2	GRP	CD7
			RAB25	DIAPH1			DYNC1I2				RNF31			DYSF	LPIN3	GSDME	CD70
			RAB27A	DICER1			DYSF				RNGTT			E2F1	LRFN5	GSK3B	CD74
			RAB27B	DIDO1			E2F1				RNU6-1			E2F4	LRP4-AS1	GSN	CD79A
			RAB5A	DIS3			ECE1				RPL10A			EBNA1BP2	LRP8	GSR	CD79B
			RAC1	DIS3L			ECEL1				RPL11			EBP	LRPPRC	GSTO1	CD80
			RAC3	DIS3L2			EDN1				RPL12			ECHS1	LTBP2	GUCA2A	CD81
			RACGAP1	DKC1			EEA1				RPL13			ECSIT	LTBP4	GUCA2B	CD83
			RACK1	DLC1			EEF1A1				RPL13A			EDEM1	LTBR	GUCY2C	CD86
			RAD9A	DLD			EEF1A2				RPL15			EEA1	LTF	GUSB	CD8A
			RAF1	DLEU1			EEF1E1-BLOC1S5				RPL17			EEF1A1	LUCAT1	GYPA	CD9
			RALGDS	DLEU2			EGF				RPL22			EEF1A2	MAD2L2	GYPB	CD93
			RANBP9	DLG1			EGFR				RPL23			EEF1B2	MAFG	GYPC	CD99
			RAP1A	DLG4			EGR2				RPL23A			EEF1D	MAFG-AS1	GYPE	CDB2
			RARA	DLGAP5			EHD3				RPL26			EEF1E1	MAGED2	GZMA	CDC20
			RB1	DLK1			EIF2AK3				RPL27			EEF1G	MAL2	GZMB	CDC25A
			RBFOX2	DLL1			EIF2B5				RPL28			EEF2	MALAT1	H19	CDC25B
			RBL2	DMBT1			EIF2S1				RPL29			EEF2K	MALINC1	H2AX	CDC25C
			RBP1	DMD			ELANE				RPL3			EEFIA2	MALT1	H2BC21	CDC27
			RELA	DNA2			ELAPOR1				RPL34			EEFIAI	MAP1LC3A	H3C1	CDC34
			RET	DNAAF5			ELAPOR2				RPL35			EFNB1	MAP1LC3B	H3C14	CDC37
			RHOA	DNAH1			ELMOD2				RPL38			EFNB2	MAP1LC3C	HABP2	CDC42
			RHOB	DNAH11			ELN				RPL39			EFTUD2	MAP3K5	HAGLROS	CDC42BPA
			RHOC	DNAH8			ELP1				RPL4			EGFR	MAP4	HAUS8	CDC45
			RHOD	DNAJC19			EMD				RPL5			EGOT	MAPILC3A	HAVCR2	CDC5L
			RHOG	DNAJC21			EMILIN1				RPL6			EGR1	MAPILC3B	HBB-LCR	CDC6
			RHOQ	DNAJC5			EMSLR				RPL7			EHMT2	MAPILC3C	HBG1	CDC7
			RIPK1	DNASE1			ENG				RPL7A			EI24	MAPK1	HCCAT5	CDC73
			RMRP	DNM1			ENO3				RPL9			EI24P1	MAPK8	HCG18	CDCA4
			RMST	DNM1L			ENPEP				RPLP1			EI24P2	MAPT	HCG27	CDCA5
			ROCK1	DNM2			ENPP1				RPLP2			EI24P3	MAPT-AS1	HDAC3	CDCA7
			ROCK2	DNMT1			ENSG00000214651				RPS10			EI24P4	MARCHF6	HDAC5	CDCA8
			ROR1	DNMT3A			ENSG00000215310				RPS12			EI24P5	MAT2A	HDAC6	CDH1
			RPL34-DT	DNMT3B			ENSG00000224207				RPS13			EIF1AX	MBOAT7	HDAC9	CDH13
			RPS6KA1	DNTT			ENSG00000226138				RPS14			EIF2A	MBTPS1	HDLBP	CDH15
			RPS6KA3	DOCK2			ENSG00000235811				RPS16			EIF2AK1	MCM5	HEIH	CDH17
			RPS6KB1	DOCK8			ENSG00000237861				RPS17			EIF2AK2	MCU	HELLS	CDH2
			S100A10	DOLK			ENSG00000258311				RPS18			EIF2AK3	MDH1	HEPH	CDH3
			S100A11	DPAGT1			ENSG00000259064				RPS19			EIF2AK4	MDH2	HERPUD1	CDH5
			S100A4	DPF2			ENSG00000259066				RPS20			EIF2B1	MDM2	HEXA	CDIP1
			S100A7	DPM1			ENSG00000265639				RPS23			EIF2B2	MDM4	HEXB	CDIPI
			S100A8	DPP4			ENSG00000269590				RPS24			EIF2B3	ME1	HEXIM1	CDK1
			S100A9	DPYD			ENSG00000271100				RPS25			EIF2S1	MEF2C	HFE	CDK11A
			S1PR1	DPYS			ENSG00000289758				RPS26			EIF2S3	MEG3	HGF	CDK11B
			SALL4	DRD1			ENTPD4				RPS27			EIF3A	MEG8	HHLA2	CDK14
			SATB1	DRD2			ENTPD7				RPS27L			EIF3B	MELTF	HIF1A	CDK15
			SBSN	DSC3			EP300				RPS29			EIF3C	MEN1	HINT1	CDK16
			SCARNA5	DSCAM			EPDR1				RPS3			EIF3D	MERTK	HLA-A	CDK19
			SCD	DSG1			EPG5				RPS4X			EIF3F	METTL14	HLA-B	CDK2
			SCRIB	DSG2			EPHB1				RPS6			EIF3J-DT	METTL16	HLA-C	CDK20
			SDC4	DSP			EPM2A				RPS8			EIF3L	METTL17	HLA-DMA	CDK2AP1
			SDCBP	DST			EPO				S100A10			EIF3M	METTL3	HLA-DMB	CDK3
			SEMA7A	DSTYK			EPOR				S100A4			EIF4A1	MEX3A	HLA-DOA	CDK4
			SERPINA1	DTNA			EPRS1				S100A6			EIF4A3	MFGE8	HLA-DOB	CDK5
			SERPINB1	DTNBP1			EPS15				SCARNA5			EIF4B	MGC32805	HLA-DPA1	CDK5R1
			SERPINB5	DUSP1			ERBB2				SCYL2			EIF4E	MGST1	HLA-DPB1	CDK5RAP3
			SERPINE1	DUSP19			ERBB3				SEC16A			EIF4EBP1	MIAT	HLA-DQA1	CDK6
			SESN1	DUSP6			ERCC1				SERBP1			EIF4G1	MIF	HLA-DQA2	CDK6-AS1
			SESN2	DVL1			ERCC2				SERTAD1			EIF4G2	MILIP	HLA-DQB1	CDK7
			SESN3	DVL2			ERCC3				SF1			EIF4G3	MIOX	HLA-DQB2	CDK8
			SETD2	DYNC1H1			ERGIC1				SFPQ			EIF5	MIR100HG	HLA-DRA	CDK9
			SFN	DYNC2H1			ERLIN2				SFTA3			EIF5A	MIR106A	HLA-DRB1	CDKN1A
			SFRP1	DYNLL1			ERV3-1				SFTPA1			EIF5B	MIR106B	HLA-DRB3	CDKN1B
			SFTA3	DYRK1A			ERVFRD-1				SGK1			EIF6	MIR10B	HLA-DRB4	CDKN1C
			SGK1	DYSF			ERVW-1				SHARPIN			ELAPOR1	MIR1-2	HLA-DRB5	CDKN2A
			SH2B3	E2F1			ESR1				SIRPA			ELAPOR2	MIR122	HLA-E	CDKN2AIP
			SH3GLB1	E2F2			ESR2				SIRT2			ELAPORI	MIR1228	HLA-F	CDKN2B
			SHC1	E2F3			ESYT1				SIRT3			ELAVL1	MIR1231	HLA-G	CDKN2B-AS1
			SIK1	E2F4			ETFA				SIRT5			ELF1	MIR124-1	HLA-H	CDKN2C
			SIK2	EBAG9			ETFB				SIRT6			ELOB	MIR1244-3	HLA-S	CDKN2D
			SIRPA	EBF3			ETFDH				SKP2			ELP3	MIR125A	HMGA2	CDKN3
			SIRT1	ECD			EVA1A				SLC12A2-DT			EMC1	MIR127	HMGB1	CDR1-AS
			SIRT3	ECE1			EWSR1				SLC16A1			EMC6	MIR1273C	HMGB2	CDSN
			SIRT6	ECT2			EXOSC10				SLC25A1			EMD	MIR1276	HMGB3	CDT1
			SIX1	EDN1			EXOSC3				SLC25A10			EMG1	MIR1287	HMGCR	CEACAM1
			SKI	EDN3			EXOSC8				SLC25A13			EMP2	MIR1291	HMHB1	CEACAM5
			SKP1	EDNRA			EYS				SLC25A37			EMSLR	MIR129-1	HMMR	CEACAM6
			SKP2	EDNRB			EZH2				SLC25A4S			ENDOG	MIR1306	HMOX1	CEBPA
			SLC2A1	EED			EZR				SLC25A5			ENG	MIR132	HNRNPDL	CEBPA-DT
			SLC2A2	EEF1A1			F2				SLC25A6			ENO1	MIR133B	HNRNPL	CEBPB
			SLC39A6	EEF2			F2R				SLC30A9			ENPP1	MIR137	HORMAD2	CEBPD
			SLCO1B3	EFHC1			F2RL1				SLC39A7			ENSG00000243902	MIR138-1	HOTAIRM1	CEBPZ
			SLPI	EFL1			F3				SLCO4A1-AS1			ENSG00000284820	MIR139	HOTTIP	CELF1
			SMAD1	EFNB2			FADD				SMAD5-AS1			ENTREP3	MIR140	HOXA11-AS	CELF2
			SMAD3	EGF			FAF2				SMN1			EP300	MIR142	HOXB7	CEMIP
			SMAD4	EGFR			FAM241B				SMN2			EPAS1	MIR144	HOXB-AS1	CENPA
			SMAD5-AS1	EGLN1			FAM98A				SMPDI			EPB41L2	MIR146A	HOXB-AS3	CENPB
			SMAD7	EGLN2			FARS2				SNCA			EPG5	MIR146B	HP	CENPC
			SMARCB1	EGR1			FAS				SNHG1			EPHA1	MIR147A	HPSE	CENPE
			SMARCE1	EGR2			FASLG				SNHG12			EPHA2	MIR148A	HRAS	CENPF
			SMPD1	EHMT1			FASN				SNHG14			EPHA3	MIR148B	HSD17B12	CENPS
			SNAI1	EHMT2			FBLN5				SNHG16			EPHA7	MIR149	HSP90AA1	CENPS-CORT
			SNAI2	EIF1AX			FBN1				SNHG6			EPHB2	MIR152	HSP90AA2P	CENPW
			SNAI3	EIF2AK2			FBN2				SNHG7			EPHB3	MIR153-2	HSP90AB1	CEP164
			SNCG	EIF2AK3			FBXO38				SNORA73B			EPHB4	MIR155	HSP90B1	CEP250
			SNHG17	EIF2AK4			FBXO7				SNORD104			EPM2A	MIR155HG	HSPA14	CEP55
			SNORA66	EIF2B1			FCGR1A				SNORD118			EPPK1	MIR15A	HSPA1A	CERK
			SNORA80E	EIF2B2			FCGR2A				SNORD15A			EPRS1	MIR15B	HSPA1B	CERKL
			SNORD118	EIF2B4			FCGR2B				SNRPE			EPS15L1	MIR16-2	HSPA1L	CERNA1
			SNORD138	EIF2B5			FCGR3A				SNRPF			ERAL1	MIR17	HSPA2	CERNA2
			SNORD15A	EIF2S1			FCGR3B				SOAT1			ERAS	MIR17HG	HSPA4	CERNA3
			SNORD44	EIF3A			FCGRT				SOD2-OT1			ERBB2	MIR181A2	HSPA5	CERS2
			SNX1	EIF4A1			FCMR				SOX17			ERBB4	MIR181B1	HSPA6	CERS5
			SOD2	EIF4E			FCRL3				SP1			ERCC2	MIR181D	HSPA8	CERS6
			SOD2-OT1	EIF4EBP1			FDPS				SP6			ERCC4	MIR182	HSPB1	CERT1
			SORT1	EIF4G1			FDX2				SPATA2			ERCC6	MIR188	HSPB2	CFH
			SOX9	ELAC2			FER				SPP1			ERFE	MIR193A	HSPD1	CFL1
			SP1	ELAVL1			FES				SQSTM1			ERGIC3	MIR193BHG	HSPE1	CFL2
			SPHK1	ELF4			FFAR4				SRC			ERLIN1	MIR194-1	HSPG2	CFLAR
			SPIB	ELK1			FGD4				SRD5A3-AS1			ERLIN2	MIR199A2	HSPH1	CFTR
			SPINK1	ELL2			FGF10				SRP14			ERMP1	MIR199B	HTR2C	CGA
			SPOP	ELN			FGF13				SRRM2			ERN1	MIR19A	HTR3A	CGAS
			SPP1	ELOC			FGF16				SRSF1			ERP44	MIR19B1	HTRA1	CGB3
			SPTA1	ELOVL5			FGF17				SRSF10			ESR1	MIR208A	HULC	CGB5
			SRC	ELP1			FGF18				SRSF3			ESR2	MIR20A	HYDIN	CHAC1
			SRGN	EMD			FGF2				SRSF4			ESYT1	MIR21	HYOU1	CHAC2
			SRPX2	EMG1			FGF20				SRSF6			ESYT2	MIR214	IAPP	CHACI
			SRSF3	EML3			FGF22				SRSF7			ETFA	MIR217	IBSP	CHAF1A
			SS18	EML4			FGF23				SRSF9			EVA1A	MIR221	ICAM1	CHAF1B
			SSX1	EMP2			FGF3				SSBP1			EWSR1	MIR222	ICAM2	CHCHD10
			STAT1	EMSLR			FGF4				STAG3L5P-PVRIG2P-PILRB			EXOC1	MIR223HG	ICAM3	CHCHD2
			STAT3	ENDOG			FGF5				STAM-DT			EXOC2	MIR22HG	ICOS	CHCHD3
			STAT6	ENG			FGF6				STAT2			EXOC4	MIR23A	ICOSLG	CHCHD4
			STK11	ENO1			FGF7				STAT3			EXOC7	MIR23B	ID1	CHCT1
			STK38	ENO2			FGF8				STAT4			EXOC8	MIR24-1	ID3	CHD1L
			STRN4	ENPP1			FGF9				STAT5A			EXOCI	MIR26A1	IDE	CHD8
			STX2	EOMES			FGFR1				STAT5B			EXOSC1	MIR27A	IDH1	CHEK1
			SYDE1	EP300			FGFR2				STAT6			EXOSC2	MIR29A	IDO1	CHEK2
			TAGLN	EPAS1			FGFR3				STATI			EZH2	MIR29B2	IDO2	CHGA
			TBX3	EPB41			FGFR4				STING1			EZR	MIR29C	IFIT2	CHI3L1
			TCF7L2	EPCAM			FGR				STK38			FABP5	MIR302A	IFITM3	CHIA
			TET2	EPHA2			FH				STUB1			FADD	MIR30B	IFN1-α	CHKA
			TF	EPHA3			FHIP1B				STXBP1			FAF1	MIR30E	IFNA1	CHKB-CPT1B
			TFAP2C	EPHA4			FHL1				SVIL			FAF2	MIR3189	IFNA2	CHM
			TFDP1	EPHB2			FIG4				SYNCRIP			FAIM	MIR31HG	IFNAR1	CHMP5
			TFF3	EPHB4			FIGLA				SYVN1			FAM111A	MIR3200	IFNB1	CHP1
			TGFB1	EPO			FKBP10				TAB1			FAM120A	MIR320A	IFNG	CHPF
			TGFB2	EPOR			FKBP14				TAB2			FAM131B	MIR324	IFNGR1	CHRM3
			TGFBR1	EPRS1			FKBP4				TAB3			FAM13A-AS1	MIR326	IGBP1	CHRNA5
			TGFBR2	ERBB2			FKRP				TANC2			FAM98A	MIR328	IGF1	CHRNA7
			TGFBR3	ERBB3			FKTN				TANK			FAM98B	MIR329-1	IGF1R	CHST6
			TGM1	ERBB4			FLAD1				TAPT1-AS1			FANCC	MIR330	IGF2BP2	CHUK
			THBS1	ERCC1			FLCN				TARDBP			FAP	MIR335	IGF2R	CIAO2A
			THY1	ERCC2			FLNA				TAX1BP1			FARSB	MIR338	IGFBP2	CIAPIN1
			TIAM1	ERCC3			FLNB				TBK1			FAS	MIR34A	IGH	CIAPIN1P
			TIMP1	ERCC4			FLNC				TCL6			FASLG	MIR34C	IGHE	CIB1
			TJP1	ERCC5			FLOT1				TCOF1			FASN	MIR362	IGHG1	CIBI
			TJP3	ERCC6			FLOT2				TCP1			FAT1	MIR365B	IGHM	CIDEA
			TLE1	ERCC6L2			FLT1				TET2			FAU	MIR369	IGHV3-30	CIDEB
			TLE5	ERF			FMOD				TGFBR1			FBL	MIR370	IGKC	CIDEC
			TLN1	ERG			FMR1				THRAP3			FBLN5	MIR372	IGKV2-29	CIITA
			TLN2	ERVW-1			FN1				TICAM1			FBP1	MIR373	IKBKB-DT	CINNA1
			TLR3	ESAM			FNBP1				TIMM50			FBXL2	MIR374A	IL10	CIP2A
			TMEM43	ESCO2			FNIP1				TIRP			FBXL3	MIR374B	IL11	CIRBP
			TMX2-CTNND1	ESM1			FNIP2				TLE6			FBXL4	MIR374C	IL12A	CISD2
			TNC	ESPL1			FOLH1				TLR3			FBXO21	MIR375	IL12B	CISH
			TNF	ESR1			FOLR1				TLR4			FBXO22	MIR376C	IL13	CIT
			TNFRSF10B	ESR2			FOS				TLX1NB			FBXO7	MIR378A	IL13RA2	CITED1
			TNFRSF12A	ETFA			FOXFL				TMED2-DT			FBXW11	MIR383	IL15	CITED2
			TNFRSF1A	ETS1			FOXG1				TMEM165			FBXW5	MIR3938	IL16	CKAP4
			TNFSF10	ETV6			FOXL2				TMEM263			FBXW7	MIR410	IL17A	CKB
			TP53	EWSR1			FOXO1				TMEM44			FCF1	MIR421	IL17C	CKMT1A
			TP53I11	EXOSC3			FOXO3				TMOD3			FEN1	MIR424	IL17F	CKMT1B
			TP63	EXOSC8			FOXP3				TMX2-CTNND1			FERMT2	MIR425	IL17RA	CKS1B
			TP73	EXOSC9			FSHB				TNF			FEZ1	MIR4286	IL18	CKS2
			TPM1	EXT1			FSHR				TNFAIP3			FEZ2	MIR429	IL18BP	CLCN3
			TPP2	EXT2			FTH1				TNFRSF10A			FGD5-AS1	MIR431	IL18R1	CLDN1
			TRAF2	EYA1			FTHI				TNFRSF10B			FGF1	MIR4423	IL1A	CLDN2
			TRAF6	EYA4			FTL				TNFRSF1A			FGF21	MIR4435-2HG	IL1B	CLDN3
			TRC-GCA24-1	EZH2			FUCA1				TNFRSF1B			FGF23	MIR4443	IL1R1	CLDN4
			TRD-GTC9-1	EZR			FUCAI				TNFRSF21			FGF7	MIR4458	IL1RAPL2	CLDN5
			TRIM16	F10			FURIN				TNFRSF25			FGFR1	MIR4465	IL1RL1	CLDN7
			TRIM28	F11R			FUS				TNFRSF6			FGFR2	MIR4485	IL2	CLEC11A
			TRIM31	F13A1			FXR1				TNFRSF8			FGGY	MIR4668	IL21	CLEC14A
			TRIM50	F2			FYCO1				TNFRSFIA			FH	MIR4715	IL23A	CLEC4A
			TRIM62	F2R			FYN				TNFSF10			FHL1	MIR4735	IL23R	CLIC1
			TRIM69	F2RL1			G3BP1				TNFSF12			FHL2	MIR486-1	IL27	CLIC4
			TRIP12	F3			G6PC1				TNFSF6			FIG4	MIR486-2	IL2RA	CLIP3
			TRN-GTT2-1	F8			G6PD				TNIP1			FIRRE	MIR491	IL2RB	CLN3
			TSC2	F9			GAA				TNIP2			FIS1	MIR492	IL3	CLN5
			TSG101	FABP4			GAB2				TNIP3			FKBP15	MIR494	IL33	CLN9
			TUBB3	FADD			GABARAP				TNNT2			FKBP4	MIR497	IL36G	CLOCK
			TUG1	FAF1			GABARAPL1				TNRC6B			FKBP5	MIR497HG	IL37	CLPTM1L
			TWIST1	FAH			GABARAPL2				TP53			FKBP8	MIR498	IL4	CLPX
			UBAP2	FAM107A			GABRB2				TP53I3			FKRP	MIR499A	IL4R	CLSPN
			UBE2C	FAM13A			GAK				TP63			FLAD1	MIR501	IL5	CLTC
			UBE2S	FAN1			GALC				TPM1			FLCN	MIR502	IL5RA	CLU
			UBR4	FANCA			GALNS				TPM2			FLG	MIR507	IL6	CLUH
			UCHL1	FANCC			GALT				TPM3			FLG2	MIR509-1	IL6ST	CMA1
			USP11	FANCD2			GAMT				TPM4			FLII	MIR509-2	IL7	CMTM3
			USP9X	FANCE			GAN				TRA2A			FLNA	MIR509-3	IL9	CMTM5
			VASH1	FANCF			GANAB				TRA2B			FLNB	MIR522	ILVBL	CMTM8
			VCL	FANCG			GAPDH				TRADD			FLNC	MIR532	IMMT	CNBP
			VEGFA	FANCI			GARS1				TRAF2			FLNC-AS1	MIR545	IMPDH2	CNDP2
			VIM	FANCM			GATA1				TRAF3			FLOT1	MIR552	ING1	CNKSR2
			VPS37A	FAP			GATA2				TRAF5			FLOT2	MIR572	INHA	CNOT2
			VSNL1	FARS2			GATA3				TRAF6			FLT3	MIR576	INHBA	CNP
			VSTM2L	FAS			GBA				TRAFD1			FMR1	MIR587	INPP5D	CNR1
			VTCN1	FASLG			GBA1				TRA-TGC7-1			FN1	MIR590	INS	CNR2
			VTN	FASN			GBA2				TRC-GCA24-1			FNBP1L	MIR593	INSIG1	CNTF
			WDR5	FAT1			GBE1				TRE-TTC3-1			FNIP1	MIR6073	INTS13	CNTN2
			WIPF1	FBL			GC				TRIF			FNIP2	MIR608	IRAK4	COA8
			WNT2	FBN1			GCC2				TRIM24			FOXE3	MIR609	IRF1	COIL
			WNT5A	FBN2			GCDH				TRIM28			FOXK1	MIR655	IRF3	COL11A1
			WT1	FBXO11			GCH1				TRIM72			FOXK2	MIR656	IRF4	COL18A1
			WWP1	FBXO5			GDAP1				TRIP6			FOXKI	MIR660	IRX2-DT	COL1A1
			WWTR1	FBXO7			GDAP2				TRPC6			FOXM1	MIR664A	ISG15	COL2A1
			XAF1	FBXW11			GDF5				TRPM7			FOXO1	MIR670	ISG20	COL4A2
			XDH	FBXW7			GDF9				TSC2			FOXO3	MIR6825	ITGA2	COL4A3
			XIAP	FCER2			GDNF				TTC28-AS1			FOXP1	MIR6852	ITGA2B	COL8A1
			XRCC5	FCGR2B			GF2R				TUBA1B			FRMD5	MIR7-1	ITGA4	COLEC11
			YAP1	FDPS			GFAP				TUBA1C			FSCN1	MIR7-3HG	ITGA6	COMMD1
			YWHAE	FECH			GFPT1				TUBA4A			FSTL1	MIR758	ITGAL	COMP
			YWHAZ	FER			GFRA1				TUBB4A			FTH1	MIR761	ITGAM	COMT
			ZBTB7A	FES			GGA1				TUBB4B			FTHI	MIR873	ITGAV	COP1
			ZEB1	FGA			GGA2				TUBB6			FTL	MIR874	ITGAX	COPA
			ZEB2	FGB			GGA3				TUFM			FTO	MIR9-1	ITGB1	COPB1
			ZFAS1	FGF1			GGH				TUG1			FTSJ3	MIR9-2	ITGB2	COPB2
			ZG16B	FGF10			GGT1				TWF1			FUCA2	MIR924HG	ITGB3	COPE
			ZKSCAN3	FGF14			GIMAP5				TXN			FUNDC1	MIR93	ITGB4	COPG1
			ZNF304	FGF2			GJA1				TXNIP			FUNDC2	MIR9-3HG	ITGB7	COPS3
			ZNF32	FGF23			GJB1				TYK2			FURIN	MIR98	ITIH4	COPS4
				FGF3			GLA				TYRO3			FUS	MIRLET7B	ITPR1	COPS5
				FGF4			GLB1				UBAP2			FXR2	MIRLET7C	IVNS1ABP	COPS6
				FGF7			GLDC				UBC			FYCO1	MITD1	JAG2	COQ8A
				FGF8			GLDN				UBE2D3			FZD5	MMD	JAK1	CORO1A
				FGF9			GLE1				UBE2H			G3BP1	MMP2	JAK2	CORO1C
				FGFR1			GLI1				UBE2L3			G3BP2	MPHOSPH10	JPH4	CORT
				FGFR2			GLI2				UBL4A			G6PD	MPO	JUN	COX4I1
				FGFR3			GLMP				UBL7-DT			GAA	MRPL19	KARS1	COX5A
				FGFR4			GM2A				UBR2			GAB1	MSC-AS1	KCNA4	COX6B1
				FGG			GMPPB				UCHL1			GABARAP	MSRB3	KCNH1	CP
				FH			GNA11				UGDH			GABARAPL1	MT1G	KCNH2	CPE
				FHIT			GNAI3				UGT1A1			GABARAPL2	MTCH1	KCNJ6	CPEB4
				FHL1			GNAL				UHRF1			GABARAPL3	MTIG	KCNQ1OT1	CPOX
				FHL2			GNAS				ULK1			GABPB1-AS1	MTOR	KCTD3	CPPED1
				FKBP1A			GNB1				USP21			GAK	MT-TP	KDM1A	CPQ
				FKBP5			GNB2				USP22			GAL3ST3	MUC1	KDM5B	CPS1
				FLCN			GNB4				UTP11			GALNT2	MUC16	KDM5C	CPSF6
				FLG			GNE				UVRAG			GAN	MUC20	KDM5D	CPT1A
				FLI1			GNPTAB				VBP1			GANAB	MYC	KDR	CPT1B
				FLNA			GNPTG				VCP			GAPDH	MYCN	KIF15	CPT2
				FLNB			GNRH1				VDAC2			GARS1	MYCNOS	KIF21A	CR2
				FLNC			GNRHR				VDAC3			GART	MYEOV	KIF2B	CRABP1
				FLT1			GNS				VDACI			GAS5	MYH10	KIR2DL1	CRABP2
				FLT3			GOLGA2				VIL1			GATA4	MYH16	KIR2DL3	CRADD
				FLT3LG			GOLGB1				VIM			GATAD2A	MYH9	KIT	CRAT
				FLT4			GOPC				VIM-AS1			GATD3	MYL12A	KITLG	CREB1
				FLVCR1			GOSR2				VPS24			GBA	MYL6B	KLF13	CREB3
				FMR1			GPC1				VPS4			GBA1	MYLK-AS1	KLF3-AS1	CREB3L1
				FN1			GPC2				VTRNA1-1			GBE1	MYO9B	KLF4	CREBBP
				FNIP1			GPC3				WDR77			GBF1	MYOF	KLK10	CREG1
				FOLR1			GPC4				WRNIP1			GBP1	NACA	KLK13	CREM
				FOS			GPC5				XBP1			GCN1	NADK	KLK2	CRH
				FOSL1			GPC6				XIAP			GDF15	NAMPT	KLK3	CRHR2
				FOXA1			GPLD1				XIST			GDI1	NAP1L1	KLK4	CRIP1
				FOXC1			GPNMB				XRCC1			GDI2	NAP1L4	KLK6	CRIP2
				FOXC2			GPR137				XRCC5			GEMIN4	NAP1L5	KLK7	CRIPTO
				FOXG1			GPR137B				XRCC6			GEMIN5	NAT10	KLRK1	CRK
				FOXL2			GPR137C				XRN2			GFAP	NCK1-DT	KMT2D	CRKL
				FOXM1			GPR143				YBX1			GFER	NCOA4	KMT2E	CRMA
				FOXN1			GPR155				YTHDC1			GFPT1	NDFIP1	KNG1	CRNDE
				FOXO1			GPR65				YWHAE			GGCT	NDUFA4	KPNA2	CRP
				FOXO3			GPRASP1				YWHAG			GGPS1	NDUFS7	KRAS	CRY1
				FOXP3			GPT				ZAN			GHRL	NEAT1	KRT1	CRYAA
				FPR1			GPT2				ZBP1			GIPC1	NEDD4	KRT17	CRYAB
				FSCN1			GPX2				ZBPI			GJA1	NEDD4L	KRT19	CRYBA1
				FTH1			GPX3				ZC3HAV1			GLA	NET1	KRT23	CRYBB2
				FTL			GPX5				ZFAS1			GLB1	NF2	KRT4	CSDE1
				FTO			GPX6				ZFP36			GLE1	NFE2L1	KRT8	CSE1L
				FUBP1			GPX7				ZFP91			GLG1	NFE2L2	KTN1	CSF1
				FURIN			GPX8				ZFPM2-AS1			GLI1	NFKB1	L1CAM-AS1	CSF1R
				FUS			GRAMD4				ZKSCAN2-DT			GLIPR2	NFKBIA	LACTB	CSF2
				FXN			GRB10				ZKSCAN4			GLS	NFS1	LAG3	CSF2RB
				FXR1			GRIA2				ZNF146			GLTP	NGB	LAIR1	CSF3
				FYN			GRIN1				ZNF217			GLUD1	NGLY1	LALBA	CSF3R
				FZR1			GRN				ZNF24			GMPS	NKAP	LAMA2	CSK
				G6PD			GSC				ZNF391			GNAI3	NLRP2	LAMC1	CSNK1A1
				GAD1			GSK3B				ZNF436-AS1			GNAS	NLRP3	LAMP1	CSNK1D
				GADD45A			GSN				ZNF7			GNB1	NLRP7	LAMP2	CSNK1E
				GAL			GSR				ZSCAN20			GNB2	NNT	LBHD1	CSNK2A1
				GAP43			GUSB							GNL3	NOL10	LBP	CSNK2A2
				GAPDH			GYG1							GOLGA2	NOLC1	LCP1	CSNK2B
				GARS1			GYS1							GOLM1	NOTCH2	LDHA	CSRNP1
				GAS5			GZMB							GOPC	NOX1	LDHB	CSRNP2
				GAS6			H19							GOSR1	NOX4	LDHC	CSRNP3
				GAST			H2AC18							GPC1	NPEPPS	LEMD1	CST3
				GATA1			H2AC20							GPC4	NPM1	LEP	CSTA
				GATA2			H2AX							GPR137	NQO1	LEPR	CSTB
				GATA3			H2BC21							GPR137B	NR1H4	LGALS1	CTBP1
				GATA4			H3-3B							GPRASP1	NR4A1AS	LGALS3BP	CTBP1-DT
				GATA6			H3-4							GPS1	NRF2	LGALS4	CTBP2
				GATAD1			H3-5							GPSM1	NSUN2	LGALS8	CTCF
				GCDH			H3-7							GPSMI	NSUN5	LGALS9	CTF1
				GCG			H3C12							GPX4	NTRK1	LGMN	CTH
				GCK			H3C13							GPX8	NUPR1	LGR6	CTHRC1
				GCLC			H6PD							GRAMD1A	OGDH	LGSN	CTLA4
				GDAP1			HACD1							GRB2	OGFRP1	LHCGR	CTNNA1
				GDF2			HACD3							GRN	OGT	LIG4	CTNNAL1
				GDF5			HADH							GRP	OIP5-AS1	LILRB1	CTNNB1
				GDNF			HADHA							GSDMD	OLMALINC	LILRB2	CTNNBIP1
				GFAP			HADHB							GSK3A	OTUB1	LILRB4	CTNNBL1
				GFI1			HAMP							GSK3B	OTUD1	LIMS1	CTNND1
				GFI1B			HARS1							GSN	OTUD5	LINC00324	CTPS1
				GFM1			HAS2							GSPT1	OTUD6A	LINC00458	CTRL
				GGPS1			HAVCR1							GSTM3	OTUD6B-AS1	LINC00460	CTSB
				GH1			HAVCR2							GSTO1	P4HA1	LINC00520	CTSC
				GHRL			HBA1							GSTP1	PANX1	LINC00632	CTSD
				GINS1			HBB							GTF2I	PAPPA-AS1	LINC00702	CTSE
				GJA1			HBEGF							GTPBP4	PAQR3	LINC00941	CTSG
				GJA5			HBG1							GUK1	PARK7	LINC00958	CTSH
				GJB1			HBS1L							GUSB	PARL	LINC00960	CTSK
				GJB6			HCFC2							GYS1	PAX8-AS1	LINC01094	CTSL
				GJC1			HCK							GZMB	PAXIP1-AS2	LINC01139	CTSS
				GJC2			HDAC10							H1-2	PAXIP1-DT	LINC01150	CTSV
				GLA			HDAC2							H1-4	PCAT1	LINC01191	CTTN
				GLB1			HDAC6							H1-5	PCBP1	LINC01194	CUL1
				GLDC			HDAC9							H19	PCBP2	LINC01554	CUL2
				GLE1			HEPACAM							H2AC14	PCBP2-OT1	LINC01565	CUL3
				GLI1			HEXA							H2AC21	PCBP3	LINC01579	CUL4A
				GLI2			HEXA-AS1							H2AX	PCBPI	LINC01587	CUL4B
				GLI3			HEXB							H2AZ2	PCDH20	LINC01672	CUL5
				GLIS3			HFE							H2BC15	PCDH7	LINC02576	CUL7
				GLS			HGF							H2BC21	PCDHB14	LINC02605	CUL9
				GLUD1			HGS							H2BC3	PCMT1	LINC02694	CULI
				GLUL			HGSNAT							H3C1	PCNA	LINC02909	CUX1
				GMNN			HIF1A							H3C14	PCSK6	LINC-ROR	CX3CL1
				GMPPB			HINT1							H4C1	PCSK9	LIPA	CX3CR1
				GNA11			HK1							HACD3	PDCD1	LITAF	CXADR
				GNAI1			HLA-A							HADHA	PDCD10	LMLN	CXCL1
				GNAI2			HLA-B							HADHB	PDGFRB	LMNA	CXCL10
				GNAO1			HLA-DMA							HAGLR	PDIA3	LMNB2	CXCL11
				GNAQ			HLA-DMB							HAGLROS	PDIA4	LMOD1	CXCL12
				GNAS			HLA-DOA							HARS1	PDIA6	LNX1	CXCL13
				GNE			HLA-DOB							HAVCR1	PDK4	LOC102724971	CXCL14
				GNRH1			HLA-DPA1							HAX1	PDP2	LOC107963955	CXCL16
				GNRHR			HLA-DPB1							HBB	PDSS2	LOC107980440	CXCL2
				GOLGA2			HLA-DQA1							HBS1L	PEBP1	LOC111099027	CXCL6
				GORASP1			HLA-DQA2							HCAR2	PEDS1	LOC111099028	CXCL8
				GOSR2			HLA-DQB1							HCCAT5	PELATON	LOC133206433	CXCL9
				GOT2			HLA-DQB2							HCCS	PFDN6	LOC133206434	CXCR1
				GP1BA			HLA-DRA							HCFC1	PFKFB3	LOC654780	CXCR2
				GPC3			HLA-DRB1							HCG18	PFN2	LPO	CXCR3
				GPER1			HLA-DRB3							HCG27	PGAM1	LRP1	CXCR4
				GPHN			HLA-DRB4							HCP5	PGAM5	LRP1B	CXCR5
				GPI			HLA-DRB5							HCRT	PGD	LRP2	CXXC5
				GPSM2			HMGB1							HCRTR1	PGK1	LRPAP1	CYB5A
				GPT			HMGCR							HDAC1	PGM5-AS1	LRWD1	CYB5R3
				GPX1			HMGXB4							HDAC10	PGM5P3-AS1	LSM11	CYBA
				GPX4			HMOX1							HDAC11	PGR-AS1	LSM2	CYBB
				GRB2			HMOXI							HDAC2	PGRMC1	LTA	CYC1
				GRHL2			HNRNPA1							HDAC3	PHB1	LTB4R2	CYCS
				GRIN1			HNRNPA2B1							HDAC4	PHGDH	LTBP1	CYFIP2
				GRIN2A			HNRNPDL							HDAC5	PHKG2	LTF	CYGB
				GRIN2B			HNRNPH2							HDAC6	PIM1	LY6E	CYLD
				GRN			HNRNPK							HDAC7	PINK1	LY75	CYP11A1
				GRP			HOOK1							HDAC8	PIR	LY96	CYP17A1
				GSDMB			HOOK2							HDAC9	PKM	M6PR	CYP19A1
				GSDMD			HOOK3							HDHD5	PKN2	MAG	CYP1A1
				GSDME			HORMAD1							HDLBP	PLA2G4A	MAGEA1	CYP1A2
				GSK3A			HOXA10							HEATR1	PLA2G6	MAGEA10	CYP1B1
				GSK3B			HOXD10							HERC1	PLAUR	MAGEA3	CYP24A1
				GSN			HP							HERC5	PLIN2	MAGEA4	CYP27B1
				GSR			HPCA							HERPUD1	PLTP	MAGEA6	CYP2A6
				GSTM1			HPR							HES1	PLXNA4	MAGEA9	CYP2B6
				GSTP1			HPRT1							HEXA	PLXNB2	MAGEB2	CYP2C18
				GSTT1			HPS1							HEXB	PM20D1	MAGEC1	CYP2C19
				GUSB			HPS3							HEXIM1	PNO1	MAGEC2	CYP2C8
				GYPC			HPS4							HFE	POLE2	MAGED1	CYP2C9
				GZMB			HPS5							HGF	POLQ	MAILR	CYP2D6
				H1-0			HPS6							HGF.	POLR2B	MALAT1	CYP2E1
				H1-1			HPSE							HGH1	POLR2E	MAN1A1	CYP2J2
				H1-2			HRAS							HGS	POR	MAN2A1	CYP3A4
				H1-3			HRNR							HIF1A	POU2F2	MAN2A2	CYP3A5
				H1-4			HSD17B1							HIFIA	POU6F1	MAN2B1	CYSLTR1
				H1-5			HSD17B3							HIPK2	PPARA	MAN2C1	CYSLTR2
				H19			HSD3B1							HIPK3	PPARGC1A	MANBA	CYTOR
				H2AC16			HSD3B2							HK1	PPIF	MAP1A	DAB2
				H2AC17			HSP90AA1							HK2	PRC1	MAP1B	DAB2IP
				H2AX			HSP90AB1							HLA-A	PRDM16-DT	MAP2	DACH1
				H2BC21			HSPA1A							HLA-B	PRDX1	MAP3K14	DAD1
				H3-3A			HSPA4							HLA-C	PRDX2	MAPK1	DAD1P1
				H3-3B			HSPA5							HLA-DPA1	PRDX6	MAPK12	DAG1
				H3-4			HSPA8							HLA-DPB1	PRECSIT	MAPK14	DANCR
				H3C1			HSPA9							HLA-DQA1	PRKAA1	MAPK3	DAP
				H3C11			HSPB1							HLA-DQA2	PRKAA2	MAPK8	DAP3
				H3C12			HSPB3							HLA-DQB1	PRKCB	MAPT	DAPK1
				H3C13			HSPB8							HLA-DQB2	PRKCSH	MAZ	DAPK2
				H3C14			HSPD1							HLA-DRB4	PRMT3	MBD2	DAPK3
				H3C2			HSPG2							HLA-DRB5	PRMT5	MBL2	DAPLI
				H3C3			HTN3							HM13	PRMT7	MBP	DARS1
				H4C16			HTT							HMGA1	PRMT9	MC1R	DARS2
				HABP2			HUWE1							HMGA2	PRNP	MCL1	DAXX
				HADH			HYAL1							HMGB1	PROK2	MDH2	DBH
				HADHA			HYAL2							HMGB2	PROM2	MDM2	DBN1
				HADHB			HYAL3							HMGN2	PROX1	MDS2	DBNDD2
				HAGLR			ICAM1							HMGN5	PRPF8	MEAF6	DBNL
				HAND1			ICOS							HMOX1	PRRX2	MED6	DCAF1
				HAND2			IDO1							HNF1A-AS1	PSAP	MEG3	DCC
				HASPIN			IDS							HNRNPA0	PSEN1	MEG8	DCD
				HAUS2			IDUA							HNRNPA1	PSMA1	MELTF	DCK
				HAUS3			IFI30							HNRNPA2B1	PSMA3-AS1	MESD	DCLK1
				HAUS6			IFIH1							HNRNPA3	PSMD8	MFGE8	DCLRE1C
				HAUS8			IFITM1							HNRNPAB	PSME1	MGAT1	DCN
				HAVCR1			IFITM2							HNRNPC	PTBP1	MGAT3	DCST1-AS1
				HAVCR2			IFITM3							HNRNPD	PTEN	MGAT5	DCT
				HAX1			IFNA1							HNRNPF	PTGES2-AS1	MIA	DCTN1
				HBB			IFNA10							HNRNPH1	PTGS2	MIA2	DCTN2
				HBEGF			IFNA13							HNRNPH2	PTPRG-AS1	MIA3	DCX
				HCFC1			IFNA14							HNRNPH3	PVT1	MIAT	DDAH1
				HCK			IFNA16							HNRNPK	PWAR1	MICA	DDAH2
				HCLS1			IFNA17							HNRNPL	PWAR4	MICB	DDB1
				HDAC1			IFNA2							HNRNPM	PXN-AS1	MIF	DDB2
				HDAC2			IFNA21							HNRNPU	PYCR1	MIR100	DDIAS
				HDAC3			IFNA4							HNRNPUL1	PYM1	MIR105-1	DDIT3
				HDAC4			IFNA5							HOTAIR	QSOX1	MIR1-2	DDIT4
				HDAC6			IFNA6							HOTAIRM1	RAB13	MIR122	DDN
				HDAC8			IFNA7							HOTTIP	RAB4B-EGLN2	MIR1243	DDOST
				HDAC9			IFNA8							HP1BP3	RACK1	MIR124-3	DDR1
				HEATR3			IFNAR1							HPRT1	RB1	MIR1248	DDR2
				HELLS			IFNB1							HPSE	RB1CC1	MIR125A	DDRGK1
				HES1			IFNG							HRAS	RBBP4	MIR125B1	DDX1
				HFE			IFT122							HSD17B10	RBBP7	MIR126	DDX17
				HGF			IFT140							HSD17B12	RBM10	MIR1275	DDX18
				HGSNAT			IFT43							HSF1	RBM15	MIR128-1	DDX19A
				HIF1A			IGF1							HSP90AA1	RBMS1	MIR1290	DDX20
				HIP1			IGF1R							HSP90AB1	RBMX	MIR1291	DDX21
				HIPK2			IGF2							HSP90B1	RBX1	MIR129-2	DDX39A
				HIRA			IGF2R							HSPA1A	RCN2	MIR1293	DDX39B
				HK1			IGFBP1							HSPA1B	RELA	MIR1304	DDX3X
				HK2			IGFBP3							HSPA2	REST	MIR1306	DDX4
				HLA-A			IGHMBP2							HSPA4	RETREG1	MIR132	DDX41
				HLA-B			IHH							HSPA5	RHOT1	MIR133A1	DDX42
				HLA-C			IKBKB							HSPA6	RIPK1	MIR133A2	DDX46
				HLA-DQA1			IKBKG							HSPA8	RMRP	MIR133B	DDX47
				HLA-DRB1			IKZF1							HSPA9	RMST	MIR135B	DDX5
				HMBS			IL10							HSPB1	RNF113A	MIR137HG	DDX54
				HMCES			IL11							HSPB6	RNF182	MIR139	DDX6
				HMGA1			IL13							HSPB8	RNF217-AS1	MIR140	DEDD
				HMGA2			IL13RA2							HSPBP1	RNF31	MIR143	DEDD2
				HMGB1			IL15							HSPD1	RNU6-1	MIR145	DEFB1
				HMGCL			IL17A							HSPE1	RPA2	MIR146A	DEGS1
				HMMR			IL17F							HSPH1	RPA3	MIR146B	DEK
				HMOX1			IL18							HTATIP2	RPL10	MIR148A	DELE1
				HNF1A			IL1A							HTR2B	RPL11	MIR152	DELEC1
				HNF1A-AS1			IL1B							HTRA2	RPL13A	MIR155	DELEI
				HNF1B			IL1R1							HTT	RPL15	MIR155HG	DEPDC1
				HNF4A			IL2							HULC	RPL24	MIR16-2	DEPDC1B
				HNRNPA1			IL22							HUNK	RPL26	MIR17	DEPTOR
				HNRNPA2B1			IL3							HUWE1	RPL30	MIR184	DERL1
				HNRNPH1			IL33							HYOU1	RPL34	MIR18A	DES
				HNRNPK			IL4							HYPK	RPL36A	MIR190A	DESI2
				HNRNPU			IL4R							IAPP	RPL38	MIR192	DFFA
				HOTAIRM1			IL5							IARS1	RPL5	MIR193A	DFFB
				HOTTIP			IL6							IDH1-AS1	RPL7	MIR194-2	DGCR5
				HOXA10			IL6R							IDH2	RPL7A	MIR199B	DGKA
				HOXA11-AS			IL6ST							IDO1	RPL8	MIR19A	DGKB
				HOXA9			IL7							IFI16	RPLP0	MIR19B1	DGKQ
				HOXB13			IL7R							IFI27	RPLP2	MIR200B	DGKZ
				HP			IL9							IFI30	RPPH1	MIR204	DGUOK
				HPRT1			INF2							IFIH1	RPS10	MIR206	DHCR24
				HPS5			INPP5K							IFITM1	RPS12	MIR20A	DHFR
				HPS6			INS							IFNA1	RPS13	MIR20B	DHODH
				HRAS			INSL3							IFNA10	RPS15	MIR21	DHPS
				HSD17B10			INSR							IFNA13	RPS2	MIR211	DHRS2
				HSD17B4			IPO7							IFNA14	RPS23	MIR214	DHRS4-AS1
				HSF1			IQGAP1							IFNA16	RPS27A	MIR215	DHX15
				HSP90AA1			IRAK1							IFNA17	RPS3	MIR216A	DHX30
				HSP90AB1			IRAK4							IFNA2	RPS3A	MIR219A1	DHX36
				HSP90B1			IREB2							IFNA21	RPS4X	MIR223	DHX9
				HSPA1A			IRF1							IFNA4	RPS6	MIR2277	DIABLO
				HSPA1B			IRF3							IFNA5	RPS6KB2	MIR27A	DIAPH1
				HSPA4			IRF4							IFNA6	RPS7	MIR28	DICER1
				HSPA5			IRF5							IFNA7	RPSA	MIR29A	DIDO1
				HSPA8			IRF7							IFNA8	RSF1-IT2	MIR302A	DIDOI
				HSPA9			IRGM							IFNB1	RSL1D1	MIR302C	DINOL
				HSPB1			IRS4							IFNG	RTL1	MIR30A	DIRAS3
				HSPB8			ISCU							IFNL2	RUFY1	MIR31	DKC1
				HSPD1			ITCH							IFT20	RUFY3	MIR31HG	DKK1
				HSPG2			ITFG2							IFT88	RUNX1-IT1	MIR32	DKK2
				HTR2A			ITGA7							IGF1	RUNX3	MIR320A	DKK3
				HTR3A			ITGAM							IGF1R	RUVBL1	MIR320B1	DLAT
				HTRA2			ITGAX							IGF2BP1	RUVBL2	MIR320C1	DLC1
				HTT			ITGB1							IGF2BP2	S100A4	MIR320D2	DLEU1
				HULC			ITGB3							IGF2BP3	SAT1	MIR324	DLEU2
				HUWE1			ITK							IGF2R	SAT2	MIR338	DLG1
				HYAL1			ITM2C							IGFBP3	SATI	MIR33A	DLG4
				HYOU1			IZUMO1							IGFBP5	SBF2-AS1	MIR33B	DLGAP5
				IBSP			JAK1							IKBKB	SCARA5	MIR342	DLL1
				ICAM1			JAK2							IKBKE	SCARNA10	MIR34A	DLST
				ICAM3			JAK3							IKBKG	SCARNA22	MIR34C	DLX2
				ID1			JPH3							IL10	SCARNA5	MIR3609	DLX6
				ID2			JUN							IL10RA	SCAT1	MIR3651	DLX6-AS1
				ID3			JUP							IL10RB	SCD	MIR3677	DMAP1
				IDH1			KARS1							IL12B	SCGB1D2	MIR3682	DMD
				IDH2			KBTBD13							IL12RB2	SDCBP2-AS1	MIR370	DMPK
				IDO1			KCNC1							IL13	SEC24B	MIR373	DMTF1
				IDUA			KCNE3							IL13RA1	SELENBP1	MIR374A	DNAAF10
				IER3			KCNH2							IL15	SELENOK	MIR378E	DNAH8
				IFI16			KCNJ2							IL15RA	SELENOP	MIR379	DNAJA1
				IFI27			KCNJ5							IL17A	SEMA5A	MIR381	DNAJA2
				IFIH1			KCNMA1							IL1A	SENP1	MIR3928	DNAJA3
				IFNA1			KCNQ1							IL1B	SERF2	MIR3941	DNAJB1
				IFNAR1			KCTD17							IL21	SERPINB12	MIR409	DNAJB11
				IFNAR2			KCTD7							IL23A	SERPINF1	MIR429	DNAJB13
				IFNB1			KDM6A							IL23R	SESN2	MIR4306	DNAJB4
				IFNG			KDR							IL24	SETD7	MIR4443	DNAJB6
				IFT140			KEAP1							IL2RA	SETDB1	MIR4503	DNAJB9
				IGF1			KERA							IL3	SF3B1	MIR4516	DNAJC10
				IGF1R			KICS2							IL33	SF3B2	MIR451A	DNAJC3
				IGF2			KIF13A							IL37	SFTA1P	MIR4521	DNAJC5
				IGF2-AS			KIF1A							IL4	SFTA3	MIR483	DNAJC7
				IGF2BP3			KIF1B							IL6	SGK2	MIR492	DNAJC9
				IGF2R			KIF1C							IL6R	SH3BGRL3	MIR494	DNASE1
				IGFBP2			KIF5A							IL6ST	SHARPIN	MIR497HG	DNASE1L1
				IGFBP4			KIF5B							IL7R	SHC1	MIR501	DNASE1L3
				IGFBP6			KIFIB							ILA	SHH	MIR503	DNASE2
				IGH			KIL							ILF2	SIAH2	MIR519C	DNER
				IGHG1			KISS1							ILF3	SIGLEC9	MIR522	DNM1
				IGHMBP2			KISS1R							ILK	SIRT1	MIR524	DNM1L
				IK			KIT							ILRUN	SIRT3	MIR543	DNM2
				IKBKB			KITLG							ILVBL	SIRT6	MIR548C	DNM3
				IKBKE			KL							IMMT	SKP2	MIR548E	DNM3OS
				IKBKG			KLC2							IMP3	SLAMF8	MIR561	DNMIL
				IL10			KLF1							IMP4	SLC11A1	MIR5703	DNMT1
				IL11			KLF2							IMPA1	SLC11A2	MIR579	DNMT3A
				IL12A			KLF4							IMPDH2	SLC12A5	MIR581	DNMT3B
				IL12B			KLHL22							INA	SLC1A5	MIR590	DNTT
				IL15			KLHL40							ING1	SLC25A10	MIR622	DOCK1
				IL17A			KLHL41							ING2	SLC25A13	MIR628	DPAGT1
				IL17RC			KLK3							INHBA	SLC25A31	MIR655	DPF2
				IL18R1			KMT2A							INS	SLC25A5-AS1	MIR7-3HG	DPH1
				IL1A			KMT2D							INSR	SLC27A4	MIR9-1HG	DPM1
				IL1B			KPNA2							IPMK	SLC27A5	MIR9-2	DPP4
				IL1RN			KPNB1							IPO5	SLC2A12	MIR9-2HG	DPP7
				IL2			KPTN							IPO7	SLC31A1	MIR93	DPP8
				IL2RA			KRAS							IPO8	SLC35F2	MIR939	DPP9
				IL2RB			KRT14							IQGAP1	SLC38A1	MIR98	DPYD
				IL3			KRT16							IRAK1	SLC38A5	MIR99A	DRAM1
				IL33			KRT18							IRF1	SLC39A14	MIR99B	DRD2
				IL36RN			KRT2							IRF3	SLC39A7	MIRLET7A3	DRD3
				IL4			KRT8							IRF4	SLC39A8	MIRLET7B	DRG1
				IL5			KXD1							IRF5	SLC3A2	MIRLET7C	DRG2
				IL6			KY							IRF7	SLC40A1	MIRLET7D	DSC3
				IL6R			L2HGDH							IRF8	SLC47A1	MIRLET7E	DSCAM-AS1
				IL6ST			LAG3							IRGM	SLC6A14	MIRLET7F2	DSG1
				IL7			LAMA2							IRS1	SLC7A11	MITF	DSG2
				ILF3			LAMA5							IRS4	SLC7A11-AS1	MKI67	DSG3
				ILK			LAMP1							ISG15	SLCO4A1-AS1	MLANA	DSG4
				INCENP			LAMP1P1							IST1	SLIRP	MLH1	DSP
				INF2			LAMP2							ITCH	SLX1A-SULT1A3	MLKL	DST
				ING3			LAMP3							ITGA2	SMARCA4	MLN	DSTN
				INHA			LAMP5							ITGA3	SMARCB1	MLXIPL	DSTYK
				INHBA			LAMTOR1							ITGA5	SMC3	MME	DTHD1
				INPPL1			LAMTOR2							ITGA6	SMG9	MMP1	DTL
				INS			LAMTOR3							ITGAL	SNAI2	MMP11	DTNA
				INSR			LAMTOR3P1							ITGAM	SNAI3-AS1	MMP13	DUSP1
				INVS			LAMTOR3P2							ITGAV	SNAP29	MMP14	DUSP10
				IQGAP1			LAMTOR4							ITGB1	SNCA	MMP2	DUSP13A
				IRAK1			LAMTOR5							ITGB1BP1	SND1	MMP3	DUSP13B
				IRAK4			LAMTOR5P1							ITGB2	SNHG1	MMP7	DUSP19
				IREB2			LAMTORI							ITGB3	SNHG10	MMP9	DUSP2
				IRF1			LAPTM4A							ITGB4	SNHG12	MMS22L	DUSP22
				IRF2BP2			LAPTM4B							ITM2B	SNHG14	MOG	DUSP26
				IRF3			LAPTM4BP1							ITPR1	SNHG16	MOGS	DUSP3
				IRF4			LAPTM4BP2							ITPR2	SNHG17	MOK	DUSP4
				IRF7			LAPTM5							ITPR3	SNHG21	MPHOSPH10	DUSP5
				IRS1			LAPTMS							ITSN1	SNHG4	MPIG6B	DUSP6
				IRS2			LARGE1							JAK1	SNHG6	MPL	DUSP7
				ISG15			LARS1							JAK2	SNHG7	MPO	DUT
				ISL1			LAT							JMY	SNHG8	MPP1	DUX4
				ITCH			LAT2							JPX	SNORA56	MPZ	DUXAP10
				ITGA1			LBR							JUN	SNORA66	MR1	DUXAP8
				ITGA2			LCDR							JUNB	SNORD104	MRC1	DVL2
				ITGA3			LCN2							JUP	SNORD118	MRPL28	DYNC1H1
				ITGA4			LDB3							KARS1	SNORD15A	MRPS26	DYNC1LI1
				ITGA5			LDHA							KAT2A	SNORD46	MRS2	DYNLL1
				ITGA6			LDHB							KAT2B	SNORD95	MS4A1	DYNLL2
				ITGAL			LDLR							KAT5	SNRPA	MS4A2	DYRK1A
				ITGAM			LEMD3							KAT8	SNRPA1	MSH2	DYRK1B
				ITGAV			LEP							KCNQ1OT1	SNRPB	MSH3	DYRK2
				ITGAX			LGALS1							KCTD7	SNRPC	MSH6	DYRK3
				ITGB1			LGALS3							KDELR1	SNRPD1	MSLN	E2F1
				ITGB2			LGALS9							KDM1A	SNRPD2	MSMB	E2F2
				ITGB3			LGI4							KDM2A	SNRPF	MSN	E2F3
				ITGB3BP			LGMN							KDM2B	SNU13	MSR1	E2F4
				ITGB4			LHCGR							KDM3B	SOCS1	MST1	E2F5
				ITGB5			LIF							KDM4A	SOCS2	MSTN	E2F6
				ITGB6			LIFR							KDM4B	SOD1	MTCO2P12	E2F7
				ITIH4			LIG4							KDR	SOD2	MTIF2	E2F8
				ITPR1			LILRA4							KEAP1	SOD2-OT1	MTOR	EAF1
				ITPR3			LIMK1							KERA	SOX15	MTPN	EAF2
				IVL			LINC01672							KHDRBS1	SOX2	MTR	EAPP
				IVNS1ABP			LINC02605							KHSRP	SP1	MT-RNR1	EBAG9
				JAG1			LIPA							KIDINS220	SPACA6-AS1	MT-TD	EBF1
				JAG2			LIPB							KIF23	SPARC	MT-TE	EBF2
				JAGN1			LIPF							KIF25	SPAST	MT-TP	EBF3
				JAK1			LITAF							KIF5A	SPC25	MT-TV	EBF4
				JAK2			LITAFD							KIF5B	SPCS2	MUC1	ECHS1
				JAK3			LMAN1							KISS1	SPHK1	MUC2	ECRG4
				JPH2			LMBRD1							KIT	SPI1	MUC21	ECSCR
				JUN			LMNA							KL	SPINK2	MUC4	ECT2
				JUNB			LMNB1							KLF4	SPP1	MUC6	EDA2R
				JUND			LMOD3							KLF5	SPRR1A	MUSK	EDAR
				JUP			LNPEP							KLHDC10	SPTBN2	MUTYH	EDIL3
				KANK1			LOC100421257							KLHL11	SPTLC1	MVP	EDN1
				KANSL1			LOC100500719							KLHL20	SQLE	MX1	EDNRA
				KARS1			LOC100510710							KLHL22	SQOR	MYBPC1	EDNRB
				KAT2A			LOC102723407							KLHL3	SQSTM1	MYC	EED
				KAT2B			LOC106050102							KLRF1	SREBF1	MYCN	EEF1A1
				KAT5			LOC106050103							KLRK1	SREBF2-AS1	MYD88	EEF1A2
				KAT6A			LOC106627981							KMT2A	SRSF2	MYH14	EEF1B2
				KAT6B			LOC126805661							KPNA2	SRSF8	MYH7B	EEF1E1
				KAT7			LOC126806063							KPNA3	SSBP1	MYH8	EEF1G
				KCNA1			LOC126860055							KPNA6	ST3GAL6-AS1	MYH9	EEF2
				KCNA2			LOC126862402							KPNB1	STAT3	MYL1	EEF2K
				KCNA5			LOC126862423							KRAS	STC1	MYL2	EFEMP1
				KCNH2			LOC126862447							KRBA1	STC2	MYL3	EFHD2
				KCNJ10			LOC126863160							KRT18	STEAP1	MYLK	EFNA1
				KCNJ11			LOC129391064							KRT19	STEAP3	MYO1A	EFNB2
				KCNMA1			LOC129930245							KRT2	STING1	MYO1B	EFS
				KCNN4			LOC129936056							KRT8	STK11	MYO1E	EFTUD2
				KCNQ1OT1			LOC129936434							KRT9	STOM	MYO1G	EGF
				KDM1A			LOC129992886							KTN1	STOML2	MYO5A	EGFL7
				KDM2B			LOC129994126							KXD1	STUB1	MYO5B	EGFR
				KDM5B			LOC129996727							LACRT	STYK1	MYO5C	EGLN1
				KDM5C			LOC129999940							LAMB1	SUMO1	MYO6	EGLN2
				KDM6A			LOC130000316							LAMP1	SYVN1	MYO7A	EGLN3
				KDM6B			LOC130004578							LAMP2	TAF15	MYO9A	EGR1
				KDR			LOC130005193							LAMP3	TAGLN	MYO9B	EGR2
				KEAP1			LOC130005207							LAMTOR1	TALDO1	MYOM1	EGR3
				KHDRBS1			LOC130009913							LAMTOR2	TAX1BP1	MYOM2	EHMT2
				KIF11			LOC130056217							LAMTOR3	TBC1D5	N4BP1	EI24
				KIF14			LOC130058158							LAMTOR4	TBCA	NAA15	EID1
				KIF18A			LOC130059762							LAMTOR5	TBK1	NAGA	EIF1AX
				KIF1B			LOC130060903							LANCL1	TBRG4	NAGK	EIF2A
				KIF1C			LOC130061900							LANCL2	TCEA1	NALT1	EIF2AK2
				KIF20A			LOC130063376							LAP3	TCL6	NANOG	EIF2AK3
				KIF20B			LOC130063648							LAPTM4B	TDRKH-AS1	NARS1	EIF2AK4
				KIF22			LOC130063650							LARP1	TECR	NASP	EIF2S1
				KIF23			LOC130065974							LARP4	TES	NAT1	EIF2S2
				KIF2A			LOC130068781							LARPI	TET2	NAT2	EIF2S3
				KIF2C			LOC132089454							LARS1	TEX264	NBR2	EIF3A
				KIF5A			LOC646506							LATS1	TF	NCAM1	EIF3B
				KIF5B			LOX							LATS2	TFAP2A	NCAPG	EIF3C
				KIFC1			LPIN1							LBR	TFCP2L1	NCL	EIF3CL
				KIR2DL5A			LPL							LCOR	TFR2	NCOA1	EIF3D
				KIR3DL2			LRBA							LDHA	TFRC	NCR1	EIF3E
				KIT			LRP1							LDHB	TGFB1	NCSTN	EIF3F
				KITLG			LRP11							LDLR	TGFB2	NDUFV3	EIF3G
				KLF10			LRP12							LEF1-AS1	TGFBR1	NECTIN1	EIF3H
				KLF11			LRP2							LEP	TIGAR	NECTIN2	EIF3I
				KLF4			LRP4							LEPR	TIMP1	NEDD8	EIF3J
				KLF5			LRP5							LETM1	TIMP2	NEDD9	EIF3J-DT
				KLF6			LRRC8A							LETM2	TLR4	NEFM	EIF3K
				KLK3			LRRC8E							LGALS1	TMED10	NEK1	EIF3L
				KMT2A			LRRK2							LGALS3	TMED8	NELFA	EIF3M
				KMT2C			LRSAM1							LGALS3BP	TMEM105	NEMF	EIF4A1
				KMT2D			LSM7							LGALS7	TMEM161B-DT	NES	EIF4A3
				KMT2E			LTBP3							LGALS8	TMEM164	NEU1	EIF4B
				KMT5A			LTF							LGALS9	TMEM254-AS1	NEUROD1	EIF4E
				KNL1			LUM							LIMA1	TMEM72-AS1	NEXN	EIF4EBP1
				KNSTRN			LYN							LINC00324	TMPO-AS1	NF2	EIF4G1
				KNTC1			LYSET							LINC00336	TMX2-CTNND1	NFATC1	EIF4G2
				KPNB1			LYST							LINC00467	TNF	NFATC2	EIF5A
				KRAS			M6PR							LINC00470	TNFAIP3	NFE2L2	EIF5A2
				KRIT1			MAF							LINC00511	TNFRSF19	NFKB1	EIF5B
				KRT1			MAGT1							LINC00515	TNFSF11	NFKBIA	EIF6
				KRT10			MAL							LINC00520	TNPO1	NGF	ELAC2
				KRT13			MALT1							LINC00641	TP53	NGFR	ELANE
				KRT14			MAN1B1							LINC00665	TP53TG1	NGLY1	ELAPOR1
				KRT15			MAN2B1							LINC00857	TPD52L2	NLRC5	ELAPOR2
				KRT16			MAN2B2							LINC00861	TPM1	NLRP3	ELAVL1
				KRT17			MAN2C1							LINC00941	TPM3	NLRX1	ELF3
				KRT18			MANBA							LINC00958	TPM4	NNAT	ELFN1-AS1
				KRT19			MANBAL							LINC00963	TRAM2-AS1	NOD2	ELK1
				KRT20			MAP1LC3A							LINC00987	TRA-TGC7-1	NOS2	ELL3
				KRT5			MAP1LC3B							LINC01063	TRC-GCA24-1	NOTCH2	ELMO1
				KRT7			MAP1LC3C							LINC01554	TRIB3	NOTCH4	ELN
				KRT8			MAP2K1							LINC01619	TRIM11	NOX1	ELOB
				L1CAM			MAP3K20							LINC01672	TRIM21	NOX4	ELOC
				L2HGDH			MAP3K7							LINC01871	TRIM26	NOXA1	EMD
				LAG3			MAP6							LINC02488	TRIM28	NPHP3-ACAD11	EMP1
				LAMA1			MAPILC3A							LINC02527	TRIM3	NPHS1	EMP2
				LAMA5			MAPK1							LINC02605	TRIM36	NPM1	EMSLR
				LAMB1			MAPK14							LINC02870	TRIM46	NPPA	ENAH
				LAMB2			MAPK3							LINC03088	TRIM54	NPR1	ENC1
				LAMB3			MAPK8							LINC-PINT	TRIM59	NPR2	ENDOG
				LAMC1			MAPK8IP3							LINC-ROR	TRIM6	NPTN	ENG
				LAMP1			MAPT							LITAF	TRIM69	NPY	ENO1
				LAMP2			MARCHF1							LIX1	TRIM7	NR1H2	ENO2
				LARS2			MARCHF2							LIX1L	TRP-AGG2-6	NR3C1	ENOI
				LATS1			MARCHF4							LMAN1	TRPM4	NR3C2	ENOX2
				LATS2			MARCHF7							LMAN2	TRPM7	NR4A2	ENPP1
				LBR			MARCHF8							LMNA	TRPV1	NR5A2	ENPP2
				LCK			MARCHF9							LMNB1	TRPV4	NRAS	ENPP7
				LCN2			MARCKS							LMNB2	TRR-TCT2-1	NRG1	ENSG00000218073
				LCP1			MARS1							LMO7	TRU-TCA1-1	NRIR	ENSG00000228144
				LDHA			MATR3							LNCRNA-ATB	TTBK2	NT5E	ENSG00000259286
				LDLR			MBL2							LNPEP	TTC7B	NTF3	ENSG00000271253
				LDLRAP1			MBP							LOC109504728	TTN-AS1	NTN4	ENSG00000271623
				LEF1			MBTPS1							LOC116216141	TUBA1A	NTRK1	ENSG00000288255
				LEFTY2			MC1R							LOC116216142	TUBA1B	NTRK2	ENTPD1
				LEMD2			MCL1							LOC116216143	TUBA4B	NTRK3	ENTPD5
				LEMD3			MCM3AP							LOC116216144	TUBB4A	NUB1	ENTR1
				LEP			MCOLN1							LOC116216145	TUG1	NUCB1	EOLA1
				LEPR			MCOLN2							LOC116216146	TXN	NUDCD1	EP300
				LGALS1			MCOLN3							LOC116268446	TXNIP	NUDT6	EP400
				LGALS3			MDM2							LOC116268447	TXNL1	NUMA1	EPAS1
				LIF			MEAK7							LOC126806603	TXNRD1	NUMB	EPB41L3
				LIFR			MECP2							LOC126862737	TYMS	NUP210	EPB41L4A-AS1
				LIG1			MED20							LOC126863256	TYRO3	NUSAP1	EPC1
				LIG3			MED25							LOC129929032	UBA1	NXF1	EPCAM
				LIG4			MEG3							LOC129995449	UBC	OAS3	EPHA1
				LIMK1			MEG8							LOC130056519	UBE2C	ODC1	EPHA2
				LIMS1			MEGF10							LOC654780	UBE2D2	OFCC1	EPHA3
				LIMS2			MEIOB							LOC727709	UBE2D3	OGA	EPHA7
				LINC00963			MEST							LONP1	UBE2G2	OGDH	EPHB2
				LINC01554			MET							LRBA	UBE2J2	OGFR	EPHB4
				LINC01672			MFN2							LRG1	UBE2K	OIP5	EPHB6
				LINC02605			MFRP							LRP1	UBE2L3	OLFM4	EPHX1
				LINC-ROR			MFSD1							LRP5	UBE2N	OLIG1	EPHX2
				LIPA			MFSD12							LRP6	UBE2O	OLR1	EPIST
				LLGL1			MFSD8							LRPPRC	UBR2	OMG	EPM2A
				LLGL2			MGAM							LRRC25	UCHL1	OMP	EPO
				LMNA			MGAT3							LRRC59	UCHL3	OPA1	EPOR
				LMNB1			MGRN1							LRRFIP2	UCHL5	OPN1SW	EPRS1
				LMNB2			MICU1							LRRK2	UFL1	OSM	EPS8L3
				LMO1			MIF							LRSAM1	UHRF1	OSMR	ERAL1
				LMO2			MILR1							LRSAMI	ULK1	OTC	ERAP1
				LOC106099062			MIOS							LSG1	UNC5B-AS1	OTOA	ERBB2
				LOC107133510			MIR10A							LSM2	USF2	OTUD6B-AS1	ERBB3
				LOC107303340			MIR10B							LSM6	USP10	OTUD7B	ERBB4
				LOC126862549			MIR1224							LST1	USP11	OXA1L	ERCC1
				LOX			MIR125A							LTA4H	USP14	OXT	ERCC2
				LPA			MIR126							LTBP4	USP3	P2RX5	ERCC3
				LPIN1			MIR127							LTV1	USP35	P2RX7	ERCC4
				LPIN2			MIR1304							LUC7L2	USP44	P3H4	ERCC5
				LPP			MIR1343							LUZP1	USP7	P4HB	ERCC6
				LRBA			MIR135A1							LYN	UTP11	PA2G4	ERCC8
				LRP1			MIR140							LYPLA1	VAPA	PABPN1	ERF
				LRP2			MIR141							LYSET	VAPB	PADI4	ERG
				LRP5			MIR142							LYST	VCP	PAEP	ERLIN2
				LRP6			MIR143							LYZ	VDAC1	PAG1	ERN1
				LRPPRC			MIR144							LZTR1	VDAC2	PAGE5	ERN2
				LTA			MIR145							LZTS1	VDAC3	PAH	ERNI
				LTBR			MIR146A							M6PR	VIM	PAK2	ERO1A
				LTF			MIR146B							MACF1	VIRMA	PAK5	EROIA
				LYN			MIR148B							MACROH2A1	VTRNA1-1	PALLD	ERP29
				LYST			MIR149							MAGEA3	WAC-AS1	PANTR1	ERRFI1
				LYVE1			MIR150							MAGEA6	WBP11	PANX1	ERVW-1
				LYZ			MIR151A							MAGED1	WDR5	PAPPA-AS1	ESCO2
				LZTR1			MIR152							MAGED2	WDR76	PARD3	ESM1
				LZTS1			MIR155							MALAT1	WTAP	PARK7	ESPL1
				MAD1L1			MIR17							MALT1	WWTR1	PARP1	ESR1
				MAD2L1			MIR181A1							MANF	XBP1	PASD1	ESR2
				MAD2L2			MIR188							MAOA	XIST	PAX2	ESRRA
				MADD			MIR18A							MAP1A	XRCC5	PCA3	ESRRB
				MAFB			MIR1908							MAP1B	XRCC6	PCAT1	ESYT2
				MAGED1			MIR193A							MAP1LC3A	YAP1	PCAT2	ETHE1
				MAGI2			MIR193B							MAP1LC3B	YBX1	PCMT1	ETNK1
				MAGT1			MIR196A1							MAP1LC3B2	YME1L1	PCNA	ETS1
				MAK			MIR197							MAP1LC3C	YTHDC1	PCSK9	ETS2
				MAL			MIR199A1							MAP1S	YTHDC2	PDCD1	ETV4
				MALAT1			MIR200B							MAP2	YTHDF1	PDCD1LG2	ETV5
				MALT1			MIR200C							MAP2K1	YTHDF2	PDGFB	ETV6
				MAML1			MIR202							MAP2K3	YTHDF3	PDGFD	EVA1A
				MAOA			MIR204							MAP2K7	YTHDF3-DT	PDGFRA	EWSR1
				MAP1B			MIR21							MAP3K1	YWHAB	PDHX	EXO1
				MAP1LC3A			MIR210							MAP3K11	YWHAE	PDIA3	EXOC3
				MAP2			MIR214							MAP3K14	YWHAG	PDPN	EXOC4
				MAP2K1			MIR22							MAP3K5	YWHAZ	PDX1	EXOG
				MAP2K2			MIR221							MAP3K7	YY1	PDZD8	EXTL3
				MAP2K3			MIR23A							MAP4	YY2	PEDS1	EYA1
				MAP2K4			MIR24-1							MAP4K4	ZBTB40-IT1	PF4	EYA2
				MAP2K5			MIR25							MAPILC3A	ZC3H13	PFKFB3	EYA3
				MAP2K6			MIR27A							MAPILC3B	ZDHHC16	PGD	EYA4
				MAP2K7			MIR28							MAPILC3C	ZDHHC8	PGK1	EYAI
				MAP3K1			MIR296							MAPK1	ZEB1	PGLYRP1	EZH2
				MAP3K11			MIR29A							MAPK10	ZEB1-AS1	PGR-AS1	EZR
				MAP3K2			MIR29B1							MAPK14	ZFAS1	PHB1	F10
				MAP3K20			MIR29C							MAPK15	ZFP36	PHF20	F11R
				MAP3K3			MIR30A							MAPK3	ZFPM2-AS1	PHF3	F127L2
				MAP3K5			MIR30E							MAPK8	ZNF236-DT	PI3	F2
				MAP3K7			MIR323A							MAPK9	ZNF337-AS1	PIBF1	F2R
				MAP3K8			MIR324							MAPKAPK3	ZNF350	PIDD1	F2RL1
				MAPK1			MIR328							MAPRE1	ZNF561-AS1	PIK3C2B	F2RL2
				MAPK10			MIR330							MAPT	ZNF667-AS1	PIK3CA	F2RL3
				MAPK11			MIR335							MARCHF7	ZNF8	PIK3R1	F3
				MAPK12			MIR339							MARCHF8	ZRANB1	PIP	F5
				MAPK14			MIR340							MARCKS	ZSCAN25	PITX3	F7
				MAPK3			MIR342							MARK2		PIWIL2	F8
				MAPK7			MIR345							MARS1		PIWIL3	FAAH
				MAPK8			MIR34A							MARS2		PLA2G10	FABP12
				MAPK8IP1			MIR34B							MAT2A		PLA2G1B	FABP4
				MAPK9			MIR34C							MATR3		PLA2G2A	FABP5
				MAPKAPK2			MIR361							MAVS		PLA2G6	FABP6
				MAPRE1			MIR362							MAX		PLA2G7	FADD
				MAPRE2			MIR369							MBP		PLAAT3	FAF1
				MAPT			MIR371A							MCAM		PLAT	FAF2
				MARS1			MIR374B							MCCC1		PLAU	FAH
				MASTL			MIR378A							MCCC2		PLAUR	FAIM
				MAT2A			MIR382							MCL1		PLG	FAIM2
				MATR3			MIR423							MCM2		PLIN1	FALEC
				MAX			MIR425							MCM3		PLIN2	FAM120A
				MB			MIR449B							MCM3AP-AS1		PLK4	FAM13C
				MBD4			MIR455							MCM6		PLOD3	FAM162A
				MBP			MIR4685							MCM7		PLP1	FAM168A
				MC2R			MIR483							MCOLN1		PMEL	FAM215A
				MCAM			MIR485							MCOLN3		PMP2	FAM225A
				MCF2			MIR486-1							MDC1		PMS2	FAM32A
				MCIDAS			MIR491							MDH1		PNP	FAM3B
				MCL1			MIR494							MDH2		POGLUT2	FAM98A
				MCM10			MIR500A							MDM2		POLD3	FANCA
				MCM2			MIR501							MDN1		POLE	FANCC
				MCM3			MIR502							MECP2		PON1	FANCD2
				MCM4			MIR509-1							MED17		PON2	FANCI
				MCM5			MIR513A1							MED4		POU5F1	FANK1
				MCM6			MIR524							MEF2D		PPA1	FAP
				MCM7			MIR525							MEFV		PPARA	FARSA
				MCPH1			MIR532							MEG3		PPARD	FARSB
				MCRS1			MIR542							MEG8		PPARG	FAS
				MDC1			MIR574							MELK		PPBP	FAS-AS1
				MDH2			MIR576							MEPE		PPHLN1	FASLG
				MDK			MIR584							MET		PPIA	FASN
				MDM2			MIR590							METTL14		PPIL4	FASTK
				MDM4			MIR615							METTL3		PPP1CA	FASTKD2
				MECOM			MIR664A							MFF		PPP1R13B-DT	FAT1
				MECP2			MIR7-1							MFN1		PPP1R3A	FATE1
				MED1			MIR7-3HG							MFN2		PPP1R8	FAU
				MED12			MIR877							MFSD8		PPP2CA	FBHI
				MED13L			MIR888							MGMT		PPP2CB	FBL
				MEF2A			MIR9-1							MGST1		PPP2R3B	FBN1
				MEF2C			MIR92A1							MIAT		PPP2R5C	FBP1
				MEF2D			MIR92B							MIB1		PPP3CB-AS1	FBXL19
				MEFV			MIR93							MID1		PPP3R1	FBXL2
				MEG3			MIR98							MID2		PPT2-EGFL8	FBXL7
				MEIS1			MIR99A							MIF		PRAME	FBXO10
				MELK			MIR99B							MIR100		PRC1	FBXO11
				MEN1			MIRLET7B							MIR101-1		PRDM1	FBXO31
				MET			MIRLET7C							MIR103A1		PRDM10	FBXO32
				METTL3			MIRLET7D							MIR103A2		PRDX1	FBXO45
				MFN2			MIRLET7E							MIR106A		PRDX2	FBXO6
				MGA			MITF							MIR106B		PRDX4	FBXO7
				MGMT			MLC1							MIR107		PRDX5	FBXW11
				MGP			MLH1							MIR10B		PRELP	FBXW7
				MIAT			MLPH							MIR1-1		PREP	FCER2
				MIB1			MLST8							MIR124-1		PRF1	FCGR1A
				MICB			MMACHC							MIR124-3		PRG2	FCGR2A
				MIDEAS			MMD							MIR125A		PRKCA	FCGR2B
				MIF			MME							MIR125B1		PRKCB	FCGR3A
				MIR100			MMP1							MIR125B2		PRKCI	FCGR3B
				MIR106B			MMP13							MIR126		PRKCZ	FCMR
				MIR107			MMP14							MIR128-1		PRKDC	FDPS
				MIR10A			MMP2							MIR1290		PRKG1	FDX1
				MIR10B			MMP3							MIR1291		PRLR	FDXR
				MIR122			MMP9							MIR129-1		PROM1	FEM1B
				MIR124-1			MOCS1							MIR129-2		PROS1	FEMIB
				MIR124-3			MOCS2							MIR1298		PRPF31	FEN1
				MIR125A			MON1A							MIR130A		PRPF38B	FENDRR
				MIR125B1			MORC2							MIR133A1HG		PRPF40A	FER1L4
				MIR125B2			MPDU1							MIR133B		PRPH2	FERMT2
				MIR126			MPEG1							MIR137		PRSS3	FERMT3
				MIR127			MPO							MIR138-1		PRTN3	FES
				MIR128-1			MPP1							MIR139		PSAP	FEZF1-AS1
				MIR130A			MPP2							MIR140		PSCA	FFAR2
				MIR130B			MPP7							MIR141		PSG2	FFAR4
				MIR133A1			MPV17							MIR142		PSIP1	FGA
				MIR133B			MPZ							MIR143		PSMB10	FGB
				MIR134			MRC1							MIR144		PSMB5	FGD5-AS1
				MIR137			MRC2							MIR145		PSMB8	FGF1
				MIR138-1			MREG							MIR146A		PSMB9	FGF10
				MIR139			MRGPRX2							MIR146B		PSMC5	FGF11
				MIR140			MSH4							MIR148A		PSMD4	FGF12
				MIR141			MSH6							MIR149		PSME1	FGF13
				MIR142			MSN							MIR150		PSME2	FGF14
				MIR143			MSTO1							MIR153-1		PSME3	FGF16
				MIR145			MT3							MIR153-2		PTCH1	FGF17
				MIR146A			MT-CYB							MIR155		PTEN	FGF18
				MIR146B			MTHFR							MIR155HG		PTGER2	FGF19
				MIR148A			MTM1							MIR15A		PTGER3	FGF2
				MIR148B			MTMR14							MIR15B		PTGS2	FGF20
				MIR152			MTMR2							MIR16-1		PTHLH	FGF21
				MIR154			MTOR							MIR16-2		PTPN11	FGF22
				MIR155			MTR							MIR17		PTPN2	FGF23
				MIR155HG			MTRFR							MIR181A1		PTPN22	FGF4
				MIR15A			MT-TP							MIR181A2		PTPN3	FGF5
				MIR15B			MUC1							MIR181D		PTPRK	FGF6
				MIR16-1			MUC5AC							MIR182		PTPRN	FGF7
				MIR17			MUSK							MIR183		PTPRN2	FGF8
				MIR17HG			MVB12A							MIR185		PTPRO	FGF9
				MIR181B1			MYBPC1							MIR186		PTPRT	FGFR1
				MIR181C			MYBPC3							MIR188		PTS	FGFR2
				MIR182			MYC							MIR18A		PTTG1	FGFR3
				MIR183			MYCN							MIR192		PTX3	FGFR4
				MIR184			MYD88							MIR193A		PUM3	FGG
				MIR186			MYH14							MIR193B		PVALB	FGR
				MIR18A			MYH2							MIR195		PVR	FHIT
				MIR192			MYH3							MIR197		PVT1	FHL1
				MIR193A			MYH7							MIR199A1		PWAR1	FHL2
				MIR193B			MYH8							MIR199A2		PWAR4	FIGNL1
				MIR195			MYH9							MIR199B		PXDN	FILIP1L
				MIR196A1			MYL1							MIR19A		PYCARD	FIP1L1
				MIR196A2			MYL11							MIR19B1		RAB17	FIS1
				MIR196B			MYL2							MIR203A		RAB38	FISI
				MIR199A1			MYL3							MIR204		RAB4B-EGLN2	FKBP1A
				MIR200B			MYO18B							MIR205		RAB5A	FKBP3
				MIR200C			MYO1B							MIR206		RABEP1	FKBP4
				MIR203A			MYO1D							MIR20A		RAC1	FKBP5
				MIR204			MYO5A							MIR20B		RACK1	FKBP8
				MIR205			MYO6							MIR21		RAD52	FKRP
				MIR206			MYO7A							MIR210		RALA	FLG
				MIR20B			MYO9A							MIR211		RALBP1	FLG2
				MIR21			MYOD1							MIR212		RALY	FLI1
				MIR210			MYOF							MIR214		RAMP1	FLII
				MIR211			MYOM1							MIR215		RAMP2	FLNA
				MIR214			MYOT							MIR216A		RAMP3	FLNB
				MIR215			MYPN							MIR216B		RANBP1	FLNC
				MIR221			NAAA							MIR22		RAPGEF3	FLOT1
				MIR222			NAF1							MIR221		RARRES2	FLT1
				MIR22HG			NAGA							MIR222		RARS1	FLT3
				MIR26A1			NAGLU							MIR223		RB1	FLT3LG
				MIR26B			NAGPA							MIR224		RB1-DT	FLT4
				MIR27A			NALCN							MIR22HG		RBM14	FN1
				MIR28			NANOG							MIR23A		RBM26	FNDC3B
				MIR296			NANOS2							MIR23B		RBM5	FNDC5
				MIR29A			NANOS3							MIR24-1		RBP3	FNIP2
				MIR29B1			NAPG							MIR24-2		RBPJ	FNTA
				MIR29C			NAPSA							MIR26A1		RCVRN	FOLR1
				MIR301A			NBEA							MIR26B		RECK	FOS
				MIR302D			NBEAL2							MIR27A		RELA	FOSB
				MIR30A			NBR1							MIR29A		REPS2	FOSL1
				MIR31			NCAM1							MIR29B1		RET	FOSL2
				MIR330			NCAN							MIR29B2		RFX4	FOXA1
				MIR339			NCOA4							MIR29C		RGS1	FOXA2
				MIR34A			NCOR1							MIR301A		RHAG	FOXD2-AS1
				MIR34B			NCSTN							MIR301B		RHBG	FOXD3
				MIR34C			NDEL1							MIR30A		RHCE	FOXD3-AS1
				MIR372			NDP							MIR30B		RHCG	FOXE3
				MIR373			NDRG1							MIR30C1		RHD	FOXG1
				MIR378A			NDUFS4							MIR30D		RHEB	FOXL1
				MIR429			NEB							MIR30E		RHOB	FOXL2
				MIR451A			NEDD4							MIR31		RHOF	FOXM1
				MIR483			NEDD4L							MIR31HG		RIGI	FOXO1
				MIR485			NEFH							MIR320A		RIOK1	FOXO3
				MIR486-1			NEFL							MIR335		RIPK1	FOXO4
				MIR494			NEK9							MIR338		RIPK3	FOXO6
				MIR498			NEU1							MIR33A		RIPK4	FOXP1
				MIR511			NEU2							MIR33B		RLIM	FOXP2
				MIR590			NEU3							MIR342		RLN1	FOXP3
				MIR7-3HG			NEU4							MIR34A		RLN2	FOXP4-AS1
				MIR92A1			NEUI							MIR34C		RMRP	FOXQ1
				MIR93			NEURL2							MIR361		RN7SL1	FPR1
				MIR96			NF1							MIR372		RNASE1	FPR2
				MIR98			NFE2L2							MIR373		RNASEH2A	FRB1
				MIR99A			NFKB1							MIR374B		RNASEH2B	FRS2
				MIR99B			NFKBIA							MIR375		RNF167	FRZB
				MIRLET7B			NGF							MIR376A1		RNF17	FSCN1
				MIRLET7C			NHERF1							MIR376B		RNF217-AS1	FSHR
				MIRLET7D			NHLRC1							MIR377		RNH1	FSTL1
				MIRLET7E			NKX2-5							MIR378A		RNPC3	FTH1
				MIRLET7F1			NLK							MIR379		RNU105B	FTL
				MIS12			NLRP3							MIR381		RNU4ATAC	FTO
				MISP			NLRP5							MIR384		RNU5A-1	FUBP1
				MITF			NME1							MIR410		RNU6-1	FUNDC1
				MKI67			NOBOX							MIR424		RNU7-1	FURIN
				MLH1			NOS2							MIR4284		RNY3	FUS
				MLH3			NOS3							MIR4458		RNY4	FUT1
				MLKL			NOTCH1							MIR4487		RNY5	FUT3
				MLLT1			NOTCH2							MIR449A		RO60	FUT4
				MLLT10			NOTCH3							MIR451A		ROCK1	FXN
				MLLT3			NPC1							MIR455		ROCR	FXR1
				MLXIPL			NPC2							MIR483		ROM1	FYN
				MMAA			NPCI							MIR494		ROPN1	FZD3
				MMACHC			NPHS1							MIR495		ROR1	FZD4
				MME			NPHS2							MIR497		ROS1	FZD9
				MMP1			NPM1							MIR498		RPA1	FZR1
				MMP13			NPPC							MIR501		RPE65	G082
				MMP14			NPR2							MIR502		RPL3	G0S2
				MMP2			NPRL2							MIR506		RPL36A-HNRNPH2	G3BP1
				MMP3			NPRL3							MIR508		RPL7	G3BP2
				MMP9			NPY							MIR5100		RPLP0	G6PC1
				MMUT			NQO1							MIR511		RPLP2	G6PD
				MNDA			NR0B1							MIR513B		RPN1	GAB1
				MOCOS			NR1H2							MIR516A1		RPN2	GAB2
				MOCS1			NR1H3							MIR526B		RPS27A	GABARAP
				MOCS2			NR1H4							MIR542		RPSA	GABARAPL1
				MOCS3			NR2E3							MIR543		RRP7A	GABARAPL2
				MOGS			NR4A3							MIR545		RSF1	GABPA
				MORC2			NR5A1							MIR581		RTN4R	GADD45A
				MPDZ			NRAS							MIR582		RUNX3	GADD45B
				MPI			NRG1							MIR638		S100A1	GADD45G
				MPL			NSF							MIR654		S100A12	GAL
				MPO			NSG1							MIR663B		S100A4	GALC
				MPP1			NSG2							MIR665		S100A6	GALNT14
				MPZ			NT5E							MIR671		S100A7	GALR2
				MRE11			NTRK1							MIR7-1		S100A8	GANAB
				MRM2			NUDC							MIR7-3HG		S100A9	GAPDH
				MRPL3			NUP62							MIR761		S100B	GARS1
				MRPL44			NUP88							MIR889		SAA4	GART
				MRPS22			OAS1							MIR9-1		SAFB	GAS1
				MRTFA			OCA2							MIR92B		SAG	GAS2
				MS4A1			OCIAD2							MIR93		SAGE1	GAS5
				MSH2			OCRL							MIR96		SAMHD1	GAS6
				MSH3			ODC1							MIR98		SARM1	GAS8
				MSH6			OGN							MIR99A		SARS1	GASAL1
				MSLN			OMD							MIR99B		SARS2	GAST
				MSN			OPA1							MIRLET7A1		SART1	GATA1
				MST1R			OPTN							MIRLET7B		SART3	GATA2
				MSTO1			ORAI1							MIRLET7BHG		SBF2-AS1	GATA4
				MTA1			OSBP							MIRLET7C		SCAF11	GATA6
				MTAP			OSBPL1A							MIRLET7E		SCARNA5	GATA6-AS1
				MT-CO1			OSTM1							MIRLET7G		SCG5	GATAI
				MT-CO2			OXR1							MIRLET7I		SCGB2A2	GBA1
				MT-CYB			OXT							MISP		SCN4A	GBF1
				MTDH			P2RX4							MITF		SCN5A	GBP1
				MTHFD1			P4HB							MKI67		SCP2	GC
				MTHFR			PAEP							MLF2		SDC4	GCA
				MTM1			PANK2							MLH1		SDCBP	GCG
				MTMR2			PAQR8							MLKL		SDCCAG8	GCK
				MT-ND1			PARP1							MLLT11		SEC61A1	GCLC
				MTOR			PATL2							MLST8		SELE	GCLM
				MTR			PAX5							MLX		SELENOP	GCN1
				MTRR			PAX7							MMP14		SELL	GDAP1
				MT-TL1			PC							MMP9		SELP	GDE1
				MTTP			PCDHGA3							MOAP1		SELPLG	GDF10
				MUC1			PCF11							MOB4		SEMA3A	GDF15
				MUC13			PCNA							MOCS2		SEMA3G	GDF2
				MUC16			PCSK9							MOGS		SEPSECS	GDF5
				MUC2			PCYOX1							MON1A		SEPTIN1	GDF6
				MUC3A			PDCD1							MON1B		SERPINA1	GDF9
				MUC5AC			PDCD1LG2							MPDU1-AS1		SERPINA3	GDNF
				MUS81			PDCD6							MPG		SERPINA6	GF1
				MUTYH			PDCD6IP							MPP1		SERPINB3	GFAP
				MVK			PDE1C							MPP2		SERPINB4	GFER
				MVP			PDE4D							MPRIP		SERPINB7	GFI1
				MXI1			PDE6A							MROCKI		SERPINC1	GFI1B
				MYB			PDE6B							MRPL20		SERPINE1	GFM1
				MYBL1			PDGFRB							MRPL22		SERPINH1	GFOD3P
				MYBL2			PDHA1							MRPL3		SETBP1	GFPT1
				MYC			PDIA3							MRPL38		SETDB1	GFRA1
				MYCN			PDIA6							MRPL4		SF1	GFRAL
				MYD88			PDK3							MRPL49		SF3B1	GGA3
				MYH10			PDLIM4							MRPS2		SFTA1P	GGCT
				MYH11			PDPK1							MRPS23		SFTA3	GGCX
				MYH14			PDXK							MRTFA		SGO1	GGT1
				MYH7			PECAM1							MRTO4		SH2D1B	GH1
				MYH9			PELI1							MSMP		SHBG	GH2
				MYL2			PEPD							MST1		SHC1	GHITM
				MYL3			PEX1							MT2A		SIGLEC9	GHR
				MYLK			PEX10							MT3		SIK3	GHRH
				MYLK2			PEX12							MTA2		SIM2	GHRHR
				MYO18B			PEX13							MTCH2		SIRPA	GHRL
				MYO5A			PEX16							MTCL1		SIX1	GHSR
				MYO5B			PEX26							MTCL2		SKAP2	GIGYF2
				MYO6			PEX3							MTCL3		SLAMF7	GIMAP5
				MYO7A			PEX5							MTCLI		SLC16A1	GINS2
				MYOD1			PEX6							MT-CO2		SLC17A5	GIT1
				MYOG			PFKM							MTDH		SLC18A3	GIT2
				MYOZ2			PGAM2							MTERF3		SLC25A4	GJA1
				MYPN			PGAP6							MTHFD1		SLC2A3	GJA3
				MYSM1			PGF							MTHFD1L		SLC2A4	GJA8
				MZT1			PGK1							MTM1		SLC30A8	GJB1
				MZT2B			PGLYRP1							MTMR14		SLC40A1	GJB2
				NAA10			PGM1							MTMR3		SLC45A2	GJB6
				NAF1			PGM3							MTMR4		SLC45A3	GKN1
				NAGLU			PGR							MTMR6		SLC4A1	GKN2
				NAMPT			PGR-AS1							MTMR8		SLC6A2	GLCCI1
				NANOG			PGRMC1							MTMR9		SLC6A3	GLG1
				NBN			PHB1							MTOR		SLC6A4	GLI1
				NCAM1			PHKA1							MTPAP		SLC7A11	GLI2
				NCAPD2			PHKB							MT-TP		SLC7A5	GLI3
				NCAPD3			PHKG2							MTX1		SLC9A1	GLIS2
				NCAPG			PHYH							MUC1		SLC9A2	GLO1
				NCAPH			PI4K2A							MUC5AC		SLC9A3	GLP1R
				NCAPH2			PI4KB							MUL1		SLK	GLP2R
				NCK1			PIEZO2							MVB12A		SLPI	GLRX
				NCKAP1L			PIK3AP1							MVB12B		SLX1A-SULT1A3	GLRX2
				NCL			PIK3C2A							MVP		SMAD5-AS1	GLRX3
				NCOA1			PIK3C3							MYBBP1A		SMARCA4	GLS
				NCOA2			PIK3CA							MYC		SMN1	GLUD1
				NCOA3			PIK3CB							MYCBP2		SMPX	GLUL
				NCOR1			PIK3CD							MYCN		SMTN	GMDS
				NCOR2			PIK3CG							MYD88		SNCA	GMDS-DT
				NCSTN			PIK3R1							MYH10		SNHG1	GMEB1
				NDC80			PIK3R4							MYH9		SNHG14	GMFG
				NDE1			PIKFYVE							MYL6		SNHG16	GMNN
				NDEL1			PINK1							MYLK		SNHG32	GMPS
				NDN			PIP4K2A							MYO1B		SNHG7	GNA11
				NDRG1			PIP4K2B							MYO1C		SNHG8	GNA12
				NDUFA13			PIP4P1							MYO6		SNORA2C	GNA13
				NDUFS2			PIP5K1C							MYOC		SNORA73B	GNA14
				NDUFS3			PITX1							MYOF		SNORD118	GNAI1
				NDUFS4			PIWIL1							NAA10		SNORD15A	GNAI3
				NEAT1			PIWIL2							NAA15		SNORD24	GNAQ
				NEB			PIWIL4							NACC1		SNORD42A	GNAS
				NECTIN2			PKHD1							NAGLU		SNORD51	GNB1
				NECTIN3			PKM							NAMPT		SNORD62B	GNB2
				NEDD1			PKP2							NAP1L1		SNRPF	GNB3
				NEDD4			PLA2G15							NAPA		SNRPG	GNB4
				NEDD4L			PLA2G3							NAT10		SNRPN	GNB5
				NEDD8			PLA2G4A							NAT16		SOCS3	GNE
				NEDD9			PLA2G5							NBR1		SOD1	GNG10
				NEFH			PLA2G6							NBR2		SOD2	GNG12
				NEFL			PLA2R1							NCAPD2		SOD2-OT1	GNG2
				NEK1			PLAA							NCBP1		SOX1	GNG3
				NEK2			PLAAT3							NCBP2		SOX10	GNG4
				NEK6			PLAUR							NCL		SOX2	GNG5
				NEK7			PLBD1							NCLN		SOX21	GNG7
				NEK9			PLBD2							NCOA3		SOX3	GNGT1
				NES			PLCZ1							NCOA4		SOX9	GNL3
				NET1			PLD1							NCOR1		SP1	GNLY
				NEUROD1			PLD2							NCSTN		SP140	GNRH1
				NEUROG3			PLD3							NDRG1		SP3	GNRH2
				NEXN			PLEC							NDRG2		SPA17	GNRHR
				NF1			PLEKHF1							NDUFA10		SPAG1	GOLGA2
				NF2			PLEKHF2							NDUFA13		SPAG17	GOLGA3
				NFASC			PLEKHG5							NDUFS7		SPAG6	GOLGB1
				NFAT5			PLEKHM1							NDUFV1		SPAG8	GOLPH3
				NFATC1			PLEKHM2							NEAT1		SPAG9	GORASP1
				NFATC2			PLG							NEDD4		SPANXA1	GORASP2
				NFATC3			PLIN3							NEDD4L		SPATA2	GP1BA
				NFE2L2			PLOD2							NEDD8		SPECC1L	GPAT4
				NFKB1			PLP1							NEFH		SPINK1	GPBAR1
				NFKB2			PMEL							NEFM		SPN	GPC3
				NFKBIA			PMP2							NEK1		SPP1	GPC6
				NGF			PMP22							NEK7		SPRR2F	GPD1
				NGFR			PNKD							NEK9		SPTAN1	GPD2
				NHEJ1			PNO1							NF1		SPTB	GPER1
				NHERF1			PNPLA2							NFATC1		SRC	GPERI
				NHP2			PNPLA3							NFE2L2		SREBF2-AS1	GPI
				NIPBL			POGLUT1							NFKB1		SSB	GPNMB
				NKX2-1			POLG							NFKB2		SST	GPR132
				NKX3-1			POLG2							NFKBIA		SSX1	GPR65
				NLRC4			POLL							NGDN		SSX2	GPRC5A
				NLRP1			POLM							NGF		ST13	GPS1
				NLRP12			POLR1C							NGFR		ST14	GPT
				NLRP3			POLR3A							NHLRC1		ST6GALNAC1	GPX1
				NME1			POMC							NHP2		ST8SIA4	GPX3
				NME2			POMGNT1							NIPBL		STAB2	GPX4
				NNT			POMGNT2							NIPSNAP1		STARD10	GPXI
				NOD2			POMK							NIPSNAP2		STAT1	GRAMD4
				NOG			POMT1							NKX2-3		STAT2	GRB10
				NOL3			POMT2							NLE1		STAT3	GRB2
				NONO			POPDC3							NLRC5		STAT4	GRB7
				NOP10			POTEF							NLRP1		STAT5A	GREM1
				NOP2			POU5F1							NLRP3		STAT6	GRHL2
				NORAD			PPARA							NLRP4		STATH	GRHL3
				NOS1			PPARG							NLRP6		STEAP1	GRIA1
				NOS1AP			PPARGC1A							NLRX1		STING1	GRIA2
				NOS2			PPIA							NOC4L		STIP1	GRIN1
				NOTCH1			PPIG							NOD1		STK11	GRIN2A
				NOTCH2			PPP3CA							NOD2		STMN1	GRIN2B
				NOTCH3			PPP3CB							NOL9		STRADA	GRIN2C
				NOX1			PPP3CC							NONO		STS	GRIN2D
				NOX4			PPP3R1							NOP53		STT3A	GRIN3A
				NPC1			PPP3R2							NOP56		STT3B	GRIN3B
				NPC2			PPT1							NOP58		STUB1	GRINA
				NPHP1			PPT2							NOS2		STX4	GRK2
				NPHP4			PPT2-EGFL8							NOS3		SUCLA2	GRK5
				NPM1			PRADX							NOTCH1		SULT2B1	GRM1
				NPPB			PRCP							NOTCH2		SUV39H1	GRM3
				NPY			PRDM1							NOTCH3		SVEP1	GRM4
				NQO1			PRDM12							NOX4		SYK	GRN
				NR0B1			PRDM9							NPAS2		SYNE1	GRP
				NR1H2			PRDX1							NPC1		SYT2	GRPEL1
				NR1H4			PRDX2							NPC2		TACC1	GRSF1
				NR1I2			PRDX4							NPCI		TACSTD2	GRWD1
				NR2E3			PRDX6							NPEPPS		TAF1B	GSDMB
				NR3C1			PRELP							NPM1		TAF6L	GSDMD
				NR3C2			PREPL							NPRL2		TALDO1	GSDME
				NR4A1			PRF1							NPRL3		TAP1	GSK3A
				NR4A2			PRICKLE1							NQO1		TAP2	GSK3B
				NR4A3			PRKAA1							NR1D2		TAPBP	GSKIP
				NR5A1			PRKAA2							NR1H2		TAPT1-AS1	GSN
				NRAS			PRKACA							NR1H3		TASOR	GSPT1
				NRG1			PRKACB							NR1H4		TAT	GSR
				NRIP1			PRKACG							NR2C2		TBC1D4	GSS
				NRP1			PRKAG2							NR2F1-AS1		TBCE	GSTA1
				NSD1			PRKAR1A							NR4A1		TBK1	GSTA2
				NSD2			PRKCB							NRAS		TBXT	GSTA4
				NSMCE3			PRKCD							NRBF2		TCL1A	GSTM1
				NSUN2			PRKCSH							NRBP2		TDRD6	GSTM3
				NT5C2			PRKCZ							NRDC		TENT5D	GSTO1
				NT5C3A			PRKDC							NRF1		TERC	GSTP1
				NT5E			PRKN							NRP1		TERT	GSTT1
				NTF3			PRKRA							NSDHL		TET1	GSTZ1
				NTF4			PRL							NSF		TET2	GTF2H2
				NTHL1			PRLR							NSFL1C		TF	GTF2I
				NTRK1			PRM1							NSMAF		TFF1	GTF3C1
				NTRK2			PRM2							NSUN4		TFRC	GTF3C5
				NTRK3			PRMT1							NTRK1		TG	GTSE1
				NUDC			PRNP							NUAK2		TGFA	GUCY1A1
				NUF2			PRODH							NUCB2		TGFB1	GUCY1A2
				NUMA1			PROM1							NUCKS1		TGFB2	GUCY1B1
				NUMB			PRPF31							NUDC		TGFBR2	GUK1
				NUP107			PRPH2							NUDT16L1		TGIF1	GULP1
				NUP133			PRPS1							NUDT21		TGM2	GUSB
				NUP153			PRRT2							NUFIP2		TH	GZMA
				NUP155			PRSS16							NUMA1		THBD	GZMB
				NUP214			PRTN3							NUMB		THBS1	GZMH
				NUP62			PRX							NUP133		THBS2	GZMK
				NUP93			PSAP							NUP155		THORLNC	GZMM
				NUP98			PSAPL1							NUP160		THPO	H1-0
				OAS1			PSAPLI							NUP188		THSD7A	H1-1
				OBSL1			PSEN1							NUP205		THY1	H1-10
				OCLN			PSEN2							NUP210		TICAM1	H1-2
				ODC1			PSMA1							NUP214		TIGIT	H1-3
				OFD1			PSMA2							NUP62		TIMP1	H1-4
				OGG1			PSMA3							NUP93		TIMP3	H1-5
				OGT			PSMA5							NUPR1		TIPARP	H19
				OLIG2			PSMC1							NUPRI		TIRAP	H2AC20
				OLR1			PSMC2							OAT		TJP1	H2AC4
				OPA1			PSMC3							OFD1		TKT	H2AX
				OPRM1			PSMC4							OGDH		TLR1	H2AZ2
				OPTN			PSMC5							OGT		TLR2	H2BC12
				ORAI1			PSMC6							OIP5-AS1		TLR3	H2BC12L
				ORC1			PSMD1							OLR1		TLR4	H2BC13
				OTULIN			PSMD11							OPA1		TLR5	H2BC14
				OTX2			PSMD12							OPTN		TLR7	H2BC18
				OXT			PSMD13							ORMDL3		TLR8	H2BC21
				P4HB			PSMD2							OSBPL7		TLR9	H2BC3
				PABPN1			PSMD3							OSBPL8		TLX1	H2BC5
				PAFAH1B1			PSMD4							OSGIN1		TLX1NB	H2BC8
				PAK1			PSMD7							OTUB1		TMBIM4	H3-4
				PAK2			PSME3							OTUD6B-AS1		TMEM256-PLSCR3	H3C1
				PAK4			PTCH1							OXSR1		TMEM31	H3C14
				PALB2			PTEN							P2RY13		TMPO	H4C1
				PALLD			PTGDR							P3H1		TMPRSS15	H4C11
				PALS1			PTGDS							P4HB		TMPRSS2	H4C14
				PANK2			PTGS2							PA2G4		TMPRSS3	H4C16
				PARD3			PTH							PABPC1		TMX2-CTNND1	H4C3
				PARD3B			PTPN1							PABPC4		TNC	HACD3
				PARD6B			PTPN22							PABPN1		TNF	HADHA
				PARK7			PTPRC							PACS2		TNFRSF10A	HADHB
				PARN			PTPRS							PAFAH1B2		TNFRSF10B	HAGLR
				PARP1			PUS1							PAFAHIB2		TNFRSF10C	HAGLROS
				PATJ			PWAR1							PAICS		TNFRSF10D	HAND2-AS1
				PAWR			PXDN							PAK1		TNFRSF11A	HASPIN
				PAX2			PXDNL							PANK2		TNFRSF11B	HAT1
				PAX3			PXK							PANX1		TNFRSF14	HAUS1
				PAX4			PYGM							PAPPA-AS1		TNFRSF17	HAVCR1
				PAX5			PYROXD1							PAQR3		TNFRSF1A	HAVCR2
				PAX6			QDPR							PARK7		TNFRSF1B	HAX1
				PAX7			QSOX1							PARL		TNFRSF4	HBA1
				PAX8			RAB10							PARN		TNFRSF8	HBA2
				PBK			RAB11A							PARP1		TNFRSF9	HBB
				PBRM1			RAB11FIP5							PAWR		TNFSF10	HBB-LCR
				PBX1			RAB12							PAX5		TNFSF11	HBE1
				PC			RAB14							PBK		TNFSF13	HBEGF
				PCAT1			RAB20							PC		TNFSF13B	HBG1
				PCCA			RAB21							PCAT1		TNFSF18	HBG2
				PCCB			RAB22A							PCBP1		TNFSF4	HBP1
				PCM1			RAB27A							PCBP2		TNFSF8	HCAR2
				PCNA			RAB29							PCED1B-AS1		TNFSF9	HCCAT5
				PCNT			RAB2A							PCID2		TNKS2	HCFC1
				PCP4			RAB32							PCK2		TNNI3	HCG11
				PCSK9			RAB33A							PCLAF		TNNT2	HCG18
				PDCD1			RAB34							PCM1		TOM1	HCK
				PDCD11			RAB35							PCMT1		TOP2A	HCLS1
				PDCD1LG2			RAB38							PCNA		TP53	HCP5
				PDCD2L			RAB39A							PCNP		TP53BP2	HCRT
				PDCD4			RAB3A							PCNT		TP53INP1	HCRTR1
				PDCD5			RAB5A							PCYT1A		TP63	HDAC1
				PDCD6			RAB5C							PDCD11		TP73	HDAC11
				PDCD6IP			RAB6A							PDCD4		TPBG	HDAC2
				PDCD7			RAB7A							PDCD5		TPD52	HDAC3
				PDE4A			RAB7B							PDCD6IP		TPH1	HDAC4
				PDGFA			RAB9A							PDE3A		TPI1	HDAC5
				PDGFB			RAB9B							PDE4A		TPO	HDAC6
				PDGFRA			RABEP1							PDGFA		TPT1	HDAC7
				PDGFRB			RAC1							PDHA1		TRA	HDAC8
				PDHA1			RAC2							PDHB		TRAF3IP2	HDAC9
				PDHX			RAD23B							PDIA2		TRAF6	HDACl
				PDK1			RAD51							PDIA3		TRAPPC1	HDGF
				PDP1			RAG1							PDIA4		TRA-TGC7-1	HDLBP
				PDPK1			RAG2							PDIA6		TRB	HEATR1
				PDPN			RAI1							PDK1		TRBC2	HEBP2
				PDS5A			RAN							PDPK1		TRBV11-2	HECTD3
				PDS5B			RANBP2							PDZD11		TRC-GCA24-1	HEIH
				PDX1			RAP1A							PEA15		TRD	HELLS
				PDYN			RAPSN							PEBP1		TRD-GTC9-1	HEMGN
				PEA15			RARA							PEDS1		TREM1	HEPN1
				PEBP1			RARS1							PEDS1-UBE2V1		TRE-TTC3-1	HERPUD1
				PECAM1			RASA2							PEG3		TREX1	HES1
				PEG10			RB1CC1							PELO		TRG	HEXIM1
				PERP			RBCK1							PELP1		TRG-CCC2-2	HEY2
				PEX1			RBM7							PER1		TRG-GCC2-6	HFE
				PEX11B			RBP3							PES1		TRG-GCC3-1	HGF
				PEX13			RBSN							PEX13		TRG-TCC1-1	HHIP
				PEX14			RBX1							PEX2		TRIM21	HIC1
				PEX19			RCVRN							PEX3		TRIM28	HICl
				PEX2			RDH12							PEX5		TRL-TAG1-1	HIF1A
				PEX26			REC8							PFAS		TRMT10C	HIF1A-AS1
				PEX5			RECK							PFKFB3		TRN-GTT2-1	HIF1A-AS2
				PFKFB3			RECQL4							PFKFB4		TRP-AGG2-5	HIF1AN
				PFKL			REEP1							PFKL		TRP-AGG2-6	HIF3A
				PFKM			RELA							PFKM		TRPM8	HIFIA
				PFN1			REN							PFKP		TRPS1	HINT1
[truncated: 3,679 more rows]
