# Supplementary material for: Unraveling the role of regulatory cell death in sepsis: an integrated analysis of bulk and single-cell sequencing data
Source: PeerJ journal article supplement (doi:10.7717/peerj.20167), 2025-10-14
Supplement: Supplemental_Material_Table_S2.xlsx [file Supplemental_Material_Table_S2.xlsx]

## Sheet: Sheet1
Gene Name	Forward Primer	Reverse Primer
ZDHHC3	GTCATCCTGCTCATCCTGCTGTG	TGTTCGTTGGAGGCGTTCAATACC
TLR5	TGCTCAAACACCTGGATGCTCAC	GCCGCCTGGATGTTGGAGATATG
GAPDH	GGCAAATTCAACGGCACAGTCAAG	TCGCTCCTGGAAGATGGTGATGG
